# Supplementary material for: RNAm5CPred: Prediction of RNA 5-Methylcytosine Sites Based on Three Different Kinds of Nucleotide Composition
Source: PubMed Central journal article supplement — Mol Ther Nucleic Acids. 2019 Oct 18;18:739–47. doi: 10.1016/j.omtn.2019.10.008 (PMC6859278; doi:10.1016/j.omtn.2019.10.008), 2019-10-18
Supplement: mmc1.pdf [file mmc1.pdf]

OMTN, Volume 18

## **Supplemental Information**

### **RNA<sub>m</sub>5CPred: Prediction of RNA 5-Methylcytosine Sites Based on Three Different Kinds of Nucleotide Composition**

**Ting Fang, Zizheng Zhang, Rui Sun, Lin Zhu, Jingjing He, Bei Huang, Yi Xiong, and Xiaolei Zhu**

**Supporting Information S1.** The benchmark dataset Met240 consists of a positive dataset and a negative dataset. The positive dataset contains 120 true m5C sites containing sequences with the m5C sites in the center, while the negative dataset contains 120 negative m5C sites containing sequences. Each of these segments is 41-bp long.

**I. 120 true m5C sites containing sequences (S+)**

>P\_1  
CGCCUCCCACGCGGGAGACCCGGGUCAAUCCCCGGCCAAU  
>P\_2  
CCGGGUCAAUCCCCGGCCACUGCACGUGGUUGUUUUUCAC  
>P\_3  
GGCCGUGGGUGUGUAGAGGCCUUGGUGGUGCAGUGGUAGAA  
>P\_4  
GUGCAGUGGUAGAAUUCUCGCCUCCCACGUGGGAGACCCGG  
>P\_5  
UGACUGCAGAUCAAGAGGUCCCCGGUCAAUCCGGGUGCC  
>P\_6  
GCUGAAGGCAUCAAAGGUUCCGGGUUCGAGUCCCGGCGGA  
>P\_7  
AGAUGUUGGUGGUAGUAGCACAUAUUCUAAAGAGAACUUCA  
>P\_8  
AGCCAGGGCUGGGCCCCGGGCAGAGCCGCCGAGGUGCAGA  
>P\_9  
CUGCGGUGAGUCUUGAAGCCCAGGGCUGGGCCCCGGGCAGAG  
>P\_10  
UAUUUGAUCGGAUCGUGACCCCAGCCCCGCCGGGCCGACCC  
>P\_11  
CGCUGUGGUCCCCGAGGUCCCGGAGCUGGCCCUUGCGGGGCC  
>P\_12  
GAGACUCUAAUCUCAGGGUCGUGGGUUCGAGCCCCACGUU  
>P\_13  
AGACGCCAGUAAUCAGUGCCCGGCUAGCUCAGUCGGUAGAG  
>P\_14  
GGUUCGAAUCCGAGUCACGGCAGGUGGUUCUAAUUGCUGG  
>P\_15  
UGCGUUGUGGCCGAGCAACCUCGGUUCGAAUCCGAGUCAC  
>P\_16  
GCGCCGCCUGGUUAGUGGCUCGCCGUGAUCGUUAUAGUGGUU  
>P\_17  
GCCUCACACGCGAAAGGUCCCCGGUUCGAAACUGGGCGGAA  
>P\_18  
CAGGUUCCGCCUGUGGUUCCGUAGUGUAGUGGUUAUCACG  
>P\_19

AGCGUGCUGGGCCCAUAACCCAGAGGUCGAUGGAUCGAAAC  
>P\_20  
GUCGAUGGAUCGAAACCAUCCUCUGCUAUCGGAGUUUUUUC  
>P\_21  
GUCGCAGUCUCCCCUGGAGGCGUGGGUUCGAAUCCCACUCC  
>P\_22  
AGUGCCCUUGCCGAGAGCGGCUCGUUGGUCUAGGGGUAUGA  
>P\_23  
CUUCGGGAGCGCCCGGAUAGCUCAGUCGGUAGAGCAUCAGA  
>P\_24  
UUAGUACUUGGAUGGGAGACCGCCUGGGAAUACCUGGUGCU  
>P\_25  
AACACGCCAGAUCUCGGAAACUAAGCAGGGUCGGGCCUGGU  
>P\_26  
UGGUCUUGUAAACCAGGGGUCGCGAGUUCGAUCCUCGCUGG  
>P\_27  
GAAGCUAAGCAGGGUCGGGCCUGGUUAGUACUUGGACGGGA  
>P\_28  
UGGCCGAGUGGUCUAAGGCGCCAGACUCAAGGUAAGCACCU  
>P\_29  
CCAUACCACCCUGAACGCGCCCAAUCUCGUCUGAUCUCGGA  
>P\_30  
AUCUCUGUCUACGGCCAUACCACCCUGAACGCGCCCAAUCU  
>P\_31  
CUGCUUUACACGCAGAAGGUCCUGGGUUCAAGCCCCAGUGG  
>P\_32  
AAUCCA AUGGGGUCUCCCCGCGCAGGUUCGAACCCUGCUCG  
>P\_33  
CUGCUGCCGUGAUCGU AUAGCGGUUAGUAGUCUGCGUUGUG  
>P\_34  
GUGGAACCAUGAGAUGUUACCUAGCGUUUUGUGAGCCAGGU  
>P\_35  
AAGGCGUUGGACUUAAGAUCCAAUGGAUUCAUAUCCGCGUG  
>P\_36  
AAAUAGCUCAGUUGGGAGAGCGUUAGACUGAAGAUCUAAAG  
>P\_37  
GGUUUGGGUCCGAGAGGUCCCGGGUUCAAAUCCCGGACGAG  
>P\_38  
GUGCCUCUCAUGUACAAGGCCUGAGUUUGACUCCAGCAC  
>P\_39  
AAGGCGUUGGACUCGAAAUCCAAUGGGGUUUUCCCGCACAG  
>P\_40  
CCCGACGGGGAGGUGUGUAGCUGCACUUUUUUGGCGACAGU  
>P\_41

CUGCGGAGCCACAGCCCAGCAGGACCUCGUGGCGCAACGG  
>P\_42  
AACGGUAGCGCGUCUGACUCCAGAUCAGAAGGCUGCGUGUU  
>P\_43  
UGC UUUGCAUGUAUGAGGCCCGGGUUCGAUCCCCGGCAUC  
>P\_44  
CCCGACGGGGAGGCCAAGUACGUUUUUACCAUUCUUCGGUA  
>P\_45  
CGUAACGGCUGCCGAAAUAGCUCAGUUGGGAGAGCGUUAGA  
>P\_46  
AGGUGGCCCGGGUUCGACUCCCGGUAUGGGAACGCUUCCUU  
>P\_47  
UGGUCUAGCGGUUAGGAUUCUGGUUUUCACCCAGGUGGCC  
>P\_48  
UGGUUUUCACCCAGGCGGCCCGGGUUCGACUCCCGGUGUGG  
>P\_49  
CCGCGGAGGUCAGACUGGGCAGGAGAUGCCGUGGACCCCG  
>P\_50  
UAAGAGUAUCUGUAUCGCGGCUCGUUGGUCUAGGGGUAUGA  
>P\_51  
AUUUGUGGACAUCUAGGUCGCUGGUUCGAUUCGGCUCG  
>P\_52  
GUAGAGCGGAGGACUGUAGCCUGUAGAAACAUUUGUGGACA  
>P\_53  
CAGUGUGCAUCCUUCGAUAGCUCAGCUGGUAGAGCGGAGGA  
>P\_54  
UGACUACGGAUCAGAAGAUUCCAGGUUCGACUCCUGGCUGG  
>P\_55  
GGGAUCGCGCCUGUGAAUAGCCACUGCACUCCAGCCUGGGC  
>P\_56  
CUGGGCAACAUAGCGAGACCCCGUCUCUUUGAACAAUAAA  
>P\_57  
GGUGCUAAUAACGCCAAGGUCGCGGGUUCGAUCCCCGUACG  
>P\_58  
AACGGUACUUGUCAUCUCCACAUGGUCUAGCGGUUAGGA  
>P\_59  
GGUUCGAAUCCGAGUCACGGCAUUGUGGGAACAAUGGCACG  
>P\_60  
GUAUAGUGGUUAGUACUCUGCGUUGUGGCCGCAGCAACCUC  
>P\_61  
GGACUCUGAAUCCAGCGAUCCGAGUUCAAAUCUCGGUGGAA  
>P\_62  
CCGAGGCCGCCAGAGCCCUCCCCGGGAGACCCGAGGCCGC  
>P\_63

CAGUCGGUAGAGCAUGAGACCCUAAAUCUCAGGGUCGUGGG  
>P\_64  
AACAUAUUGCAGCUGGGUAGCGUGGCCGAGCGGUCUAAGGC  
>P\_65  
GGCCCCGGGUUCGAUCCCCGGCCAAUGCAGCAGCUGAAAGCU  
>P\_66  
AUUCUCGCCUGCCAUGC GGGCGGCCGGGCUUCGAUCCUGG  
>P\_67  
UGUCUAGUAAACAGGAGA UCCUGGGUUCGAAUCCCAGCGGU  
>P\_68  
UGGUAUAGUGGUAAGCAUAGCUGCCUCCAAGCAGUUGACC  
>P\_69  
GACUCCAGAUCAGAAGGUUGCGUGUUCAAGUCACGUCGGGG  
>P\_70  
CUUAAGAAGCCAGCAGGUCCAUGGUGUAAUGGUUAGCACU  
>P\_71  
UCCCAUGGUGUAAUGGUUAGCACUCUGGACUUUGAAUCCAG  
>P\_72  
AAUCCCAGCGGUGCCUCAACCGAGCGUCCAAGCUCUUCCA  
>P\_73  
AUUCUCAAAACUUUAAAUGGGCAAGAAGCCCAGCUAGCUCAG  
>P\_74  
CAGUGCGAGCGGAGCAAUGCCGAGGUUGUGAGUUCGAUCCU  
>P\_75  
GGUCACGACCCUCAGGCUUCAAUCUGAGGGUCCAGGGUUC  
>P\_76  
AGGCUUCAAUCUGAGGGUCCAGGGUUCAUAUCCCUGUUCA  
>P\_77  
CUCUUCGAAUGCACUUGCGGCCCGGGUCCUCCCAGGGCUA  
>P\_78  
GUGGUCUAGUGGUUAGGAUUCAGUGCUCUCUCAUAAAUA  
>P\_79  
AGCACUCUGGACUCUGAAUCCAGCGAUCUGAGUCACGGCAC  
>P\_80  
AAGCGGUUACCUCCUCAUGCCGGACUUUCUAUCUGUCCAUC  
>P\_81  
AGUUCUUAAAUGAAACAAGCAACCUGUCUGGGUUGUUCGA  
>P\_82  
AGCAACCUGUCUGGGUUGUUCGAGACCCGCGGGCGCUCUCC  
>P\_83  
AACCUCUGGGCUGGCUUUAGCUCAGCGGUACUUCGCGUGU  
>P\_84  
CUUUAGCUCAGCGGUACUUCGCGUGUCAUCAAAACCACCUC  
>P\_85

AGUGGUUAUCACGUUCGCCUCACACGCGAAAGGUCCCCGGU  
>P\_86  
GAUGUAGCUCAGUGGUAGAGCGCAUGCUUUGCAUGUAUGAG  
>P\_87  
AGUUAGAAUACAGACAUGGCCGCCCGGCUAGCUCAGUCGGU  
>P\_88  
AGGACUGUAGGCUCAUUAAGCAAGGUAUCCUUAGGUCGCUG  
>P\_89  
AGCAAGCCCUCUUAGCGCAGCUGGCAGCGCUCAGUCUCAU  
>P\_90  
AGUCUCAUAAUCUGAAGGUCCUGAGUUCAAGCCUCAGAGAG  
>P\_91  
UCGCGGGUUCGAUCCCCGUACUGGCCAGACGUGACUUUUUA  
>P\_92  
AGAAGAUUCUAGGUUCGACUCCUGGCUGGCUCGGGUGUUA  
>P\_93  
AGGAAAUGCUAGUUCAGCUUCAGGUUCCAUGGUGUAAUGGU  
>P\_94  
AAUCCAUGUGCUCUGCACGCGUGGGUUCGAAUCCCACCUU  
>P\_95  
CAGACUCAAGUUGCUCUACUUCCCAGGUUUGGGGCUUCUGGUC  
>P\_96  
GUGGUCUAAGGCGCCAGACUCAAGUUGCUCUACUUCCCAGGUU  
>P\_97  
ACUGCUUCCUGUGUUCGGGUCUUCUGGUCUCCGUAUGGAGG  
>P\_98  
AAAGGUCCCUGGAUCAAAACCAGGCGGAAACAAGUGGUUAC  
>P\_99  
UCAAUUCUCACUCCCACCAGCAGGGUUGUUUCCGUAGUGUA  
>P\_100  
GUUAGCUCAGUCGGCUAGAGCGUGGUGCUAAUAACGCCAAG  
>P\_101  
AUCCUGGGUUCGAAUCCCAGCGGGGCCUUGAUUUCUGUACC  
>P\_102  
UGGCUUAGCUGGUUAAAGCGCCUGUCUAGUAAACAGGAGAU  
>P\_103  
GGAUGGCCGAGUGGUUAAGGCGUUGGACUUAAGAUCCAAUG  
>P\_104  
AAAAGAAGAAGCUUUGUAACCGUUGGUUCCGUAGUGUAGU  
>P\_105  
CCCAGCGGGGCCUUGGUUGGCAAGGUCAGUGUGCCUUUCUG  
>P\_106  
AAGCCAACAGAACUCUCAUGCGGUCAGGGGGUGUAGCUCAG  
>P\_107

UGAGGCCCCGGGUUCGAUCCCCGGCACCUCCAAUUGGUGGU  
>P\_108  
ACCUCCAAGUGAUGGUUUCUCCUCUGGCAGUUCUCAAGCGAC  
>P\_109  
CGAUCCCCGACACCUCCAAGCGAUGGUUUUGCUCUGGUAGU  
>P\_110  
CAAUCCCCGGCACCUCCAUCCUUUUGCUUUUAAUUUUUUU  
>P\_111  
UGUCCCAGGUGUCAGGAUGGCCGAGUGGUCUAAGGCGCCAG  
>P\_112  
UGAAGGUCCUGAGUUCGAACCUCAGAGGGGGCAAGGCGUCU  
>P\_113  
GAACGCGCCCGAUCUGGUCUCAUCUCGGAAGCUAAGCAGGG  
>P\_114  
GUCAGUUACAGAUCGAACUCCUUGUUCUACUCUUUCCCCC  
>P\_115  
AUUACACUGUCCUCCUAUGACUGGGUGUAUGGCUCAGGGGU  
>P\_116  
AGGGGACCCGACACACGUACACGUCCCUUCGAUAGCUCAG  
>P\_117  
UUAGGUCGCUUGGUUCGAUUCCGGCUCGAAGGAGAGACACC  
>P\_118  
UAUGUAUACAUGUGCCAUGCCCGAUCUCGUCUGAUCUCGGA  
>P\_119  
AAAACUUAAAACUUUACAGUCAGAGGUUCAAUUCCUCUUCU  
>P\_120  
AGAACUGCUAACUCAUGCCCCCAUGUCUAACAACAUGGCUU

## II. 120 false **m5C** sites containing sequences ( $S_0^-$ )

>N\_1  
GGGAGUGGGAACAGGAUUUGCAAGACUCCUAGUACCUAAAU  
>N\_2  
GAAAUGGCCUCAUUUGAUAAACUAGUAGGUUUUACACAGUGU  
>N\_3  
GGGCAGCCUCCUUCUUGUCUCUGUUGUUGAGGAGUGGAAUG  
>N\_4  
UCUUCAGGGUUUUCUAGGACCAAGGUGACAUUUCUACGAGG  
>N\_5  
AAGAGAUAGGCUCUCACCUGCCUAAGGGCAGCAUCUUGUUU  
>N\_6  
CGUGGAAAGGGAUUCAGAGACAGAGUCAAGAGAUGAUAGCA  
>N\_7  
GGUGGUUCUAGUGAAGGCAGCAGCAAAGGGGGUAGAGGAGC

>N\_8  
GAUAAAUGCUGGGCCCAGGGCUGGGCAUAGCCUGCUGCACU  
>N\_9  
CACUGGGUGUGCUGUAACAGCAAGGUUCAUCUGACUAUGUU  
>N\_10  
GAAACAUUACCCCUCCCUUCCCGCACCAACGAUCUGCUUGU  
>N\_11  
CUUUCUAGGGAAUAAGAUACUGUUUUUACACAGGCAAAGG  
>N\_12  
AAACCUUCUGUGGGACAGGCCCUCCACCCAAGGCCCUUUA  
>N\_13  
AAAUAAAAAAGAUCAAAGAGCUAAUAAGUGGUGGUCAGCAU  
>N\_14  
CUGUCCUACUACUGCCCCCCCCCAUCGUAUCAUAGAAAAA  
>N\_15  
AAUAAGAAAAGGUGUCAGAUCUGAUGGUGGAUAAAUAAGU  
>N\_16  
AUCAGAAGCUGAAAUCACACCACAAGUAUCCACUAGCUCC  
>N\_17  
UUAUUUAUUAAAAAGUAAAUCGUUACUGGUGCUUGAUUACA  
>N\_18  
UUUGCAGAAGCAAGCUCAGUCUCCUGAGAGUUCACGCUGAG  
>N\_19  
CCAUCAGACGAGAGAGCUUACUAUUUAGAGAGCCUUCUGCU  
>N\_20  
CCUGCCAGGAUGUGCUACCACAGGCUGUGCUAACUGAACA  
>N\_21  
GCAGACACUGCCAAAGGCAGCUGGAGCCCUACUAAGUGGAA  
>N\_22  
CAUUGGUGCCUCAGACGUAACCAGUCUGUGGGAAGUAUGAA  
>N\_23  
GCAACAUUCCUGCUGGAGGCUCCAGGAUCCUAAGGGACAC  
>N\_24  
ACCUGAUCGAUAGGGAGGAACAACAUCAACCCUACCCCA  
>N\_25  
GGUCCCGGAGAUUCCUUGUCAGCCACCCUACCCUACUUGA  
>N\_26  
UGCCACAUGUGCACGCACACACACUCAUACCCGAACACAC  
>N\_27  
UAUUGAAAUUCUAUCUCACCCUAGUCAGAAUGGCAAUCAUU  
>N\_28  
GCAGAGAAGGGAGCCACGCACACUGUGGGUUGGAAUGUAAA  
>N\_29  
UUUGCUCUGACACCACGAUCCACUGCAUCCCUCCUUAAC



>N\_30  
UCUAAGCCAAAUGAGCCCCACCCUCUUUAAGUAGAUUCUU  
>N\_31  
CAAGGUGAUCUAACAGAAUUCAUAAGGGAGAAAGUCAGGGU  
>N\_32  
AGGUAAUAGCUCUUUCUCUGCUUGUGACUUCCUGGCUC  
>N\_33  
UGCCACAUGAACACGUAUGCCAAUGGACUCUGCUCGUGU  
>N\_34  
UGCAGAGAAAUGGAUUAAACUAGCUUGGUGUGGAUCACUU  
>N\_35  
UGUUUAUUCAUUUGGCUAUCCAUGUUCUGUACCAUCA  
>N\_36  
UCUUUCUCAGUUUGUUGGAGCAUCUCAGCCAGACAAGACGC  
>N\_37  
CUGUCCAAAGUGUUCUAUUCUUUAACACAUCAACGUUGUU  
>N\_38  
AUUGAUCUUUUUAUGCCAUUCUAACUAAGUCAGAGCAGACU  
>N\_39  
AUUCAGGAGGUCUCAGAACACAGGCACAAAUGAACAUGUUC  
>N\_40  
UUUUUAAGGCUUUAUUGUCUCCUAAGACCUGCAACCAAAA  
>N\_41  
GCUUGGGGAGGUGAUUGUGUCACAAGGGCAGAGUUGUAGAG  
>N\_42  
CAUUUGGAGAAUAAAAGUUACAUUUACAAAGAGUCUUCAUG  
>N\_43  
CUUUCUCACUUCUAUAGCUACAAGAAGUAAGCUUCUGUGAU  
>N\_44  
UCACAGCUGUAACCCCCCCCCCAAGUACUAGGAUCAGUU  
>N\_45  
GGUCCUAGUCUUAAAUGUGCUUUCUGCAUUUGUCACAGAA  
>N\_46  
AUCACUAGCAUCCCCUUCUCUGGGGCAUCAAGCCUCCACA  
>N\_47  
GGACCAAGUGCAUUCCUCCCAAUGAGGCCAGAAAAGGCAA  
>N\_48  
AAACAGACUUUUUUUAUAGCCAAGUUUUUUUUUUCUUU  
>N\_49  
CUUCUAUCUUCCUUUGCCUCAGAUAUUCAUCUUGGUUUGA  
>N\_50  
UACAUUUUUUUUCUGACUAGCUGCAUGACCACUUUGCUUGU  
>N\_51  
GAUUAUGGUUUACCACUCCUCAUCUCCUCCAGAUUCUCCC

>N\_52  
CAUCUCCCUCUGUCCAACUCCAUGCCUUAUAUGGUCUCUC  
>N\_53  
CAGACACAUAUUUACACAUACACACACACACUUUAUUUU  
>N\_54  
AUAAUCACAAAAACUAGAAACCAUGAUUAAGAGCAAACGU  
>N\_55  
CCAGUAAGGUAAAAAAUACCCAAAGAAAGCAAUGUCAAUCA  
>N\_56  
UGUAAGUGGCUGCACAACUUCACUCUUUUUCUGAUUUUAUC  
>N\_57  
AAUGAGGUUUGACUUGAUUCCUAUUUUAGGUGCUUGUUUUG  
>N\_58  
UUACAUGCAUUGCAGAUUUACUGGGUAGCUUGAAUGUAAGC  
>N\_59  
CUUGAGCAAAAUUUUAUAGAUCUUGAAGUUGCAAAGUAGAC  
>N\_60  
AUCGGUCCUCAUUCGCUAACUAUAGUUUUUUUCCUAAAAG  
>N\_61  
AGACAAGAACUCCUGUUGAUCCAUAUAUGUGCCAAACCUCA  
>N\_62  
GAGCUGUCAAGGGCACACAUCUGAGAUACAUGAAUGCUGAG  
>N\_63  
UAAGACAACAACAGAGUCUUCUAGCGCAUCUUUGUGGUUU  
>N\_64  
UGUCAGAAGAAUACCAUGCCCAUUUCUCAUUUGUCAUUUC  
>N\_65  
CUCUUAUGACUACUAUUUCACUCUCUUCUAUGAGGUCAAUU  
>N\_66  
CUUAUCAAAAGUCUAAAGUUACUUGGUAAUUGUAUUUCUUGG  
>N\_67  
AUAAUUGGAAGAUUAUGAAACACUUUGUCAACCCACUAAA  
>N\_68  
AUGACAAUGUCCUCCUAUUUCUGUGUUAUACCUGCUUGAAG  
>N\_69  
GGCUUGUGAGUCUUUGGGGGCAUUUUCUAAUUAAGGGAGU  
>N\_70  
CGAGGGAGACUUACCUCUUCCCAGGGCACUCAUAAGGUGUU  
>N\_71  
GCCUUUACGUCAGUACCAGCCAUGUGGAAUGCUCUACAGGU  
>N\_72  
ACCUCGAGGAAGGGGCACAACAACUGGAACUGUUUGCCAUA  
>N\_73  
GGAACACAGGUCCAAGGCUGCUGUUUCAUUCACAAUUAUUC

>N\_74  
GGAAACACCCUUCUUCAGUACCCACCCUAGAAUGAACAAGA  
>N\_75  
AUAGAGUUAUGCAAAAUUUUCUCUUGGAAUAUUCUUUUCUU  
>N\_76  
UAGUGACAAUAGGCACAGAACAGUGGCAGCAGAGAAACAGU  
>N\_77  
AUGUUAAGGACUGAAGAAUUCUGACAUCUAUGUGUUCUGU  
>N\_78  
CUUGAAGUGGAAACUAAAAGCUUCUGUGGAAAAGGUGUUGG  
>N\_79  
GAAUAUUUCACUGAAGCAGACACAGGAAAAAGAAUGUUCUG  
>N\_80  
AAAAAACUUCUGGUGGUGUGCUGUGGCUUCUUGCUGCUUCU  
>N\_81  
UAUAAAAGAACUCAACAGACAGUGGGAAGCAGAGCUUGGC  
>N\_82  
CUCCAAAGAAUCCUUCUAAACAGGUCCAGUUCCACCAUAUC  
>N\_83  
AGAGUAAAGCGGCAUAAAUCAGGCACUACAACCUCCAAC  
>N\_84  
AAACAAUGAUAGCAUGUAUUCUCAAGGACACAGUGAUUUUU  
>N\_85  
UUAAAUAAACAUGCUUGAGUCUGAGGUAAGAGAGGGCCUCC  
>N\_86  
UUACUCUGAGAGUCCACUUUCAAAAAGCUUAGACAGCAAU  
>N\_87  
GCACAGACUGUCUCUCCUGUCACAGGUAUGUAUGUUCAUGU  
>N\_88  
GGAUCAUGAGUUACCUCUUUCUUCUCUCUCUGCAAGGCUA  
>N\_89  
AGAGCUUCUCUCAAUUCUUCUUUUUUUUUUUUUUUUUUUU  
>N\_90  
AUUUUUUUUUUUUUUUUUUUUUUUUUUUUUUUUUUUUUUU  
>N\_91  
UUGCAUUUUCUCCCAUGUUACCUUUGAAAACACCUAGGU  
>N\_92  
GUCUAAAGCCAUAACCAUCUACACAAACAUGUAGAAGUUUGA  
>N\_93  
GAUCCAGGGGGCAUCCCAUCGUGCACACAGCCUCCCGAG  
>N\_94  
CCAUGUCCUCUAUCCAUAAGCCUGAAAACACAGCCAGUAGG  
>N\_95  
UUUGAAAUCCUUGUUCAUUCUUCUAUAAUCAGUCUGGCAC

>N\_96  
CUCAUGUACAUGGCGUAUUUCAGUUUUGUCACAAAAUUUGA  
>N\_97  
CUACUAAUAAUGUAAGAGUCACGUAAUUGAGGAUGGUAUU  
>N\_98  
UGUGAGGCCAGAGAAAAGGACCUUAGGCAUCAUUUCACAGG  
>N\_99  
CAGCAAGCAGCCAUCUCUCUCUCUCUCUCUCUCUCUCUCUCUC  
>N\_100  
CAAAAAAGAACAUAUAAAACCGAUUUACACUAUAUAUAUAU  
>N\_101  
UCUCUUGGCAAUCCUCCUACCCUAGCUGCCAAGUAUUUGAC  
>N\_102  
UUUAACUAAUAUACUGGAAACAUAAAAAUAUUUAUAUUACC  
>N\_103  
GCACUUCUUUAAUCUCUUUUCGCCUUAUUGGUUGAUUAUAGG  
>N\_104  
AUUUCUCACUGAAUCAAGCCCUACUGGUUGGUUACAAUGG  
>N\_105  
CCCAAUGCUGACAUAACAUGCUUAUGCUGUCUCCUUGGAA  
>N\_106  
UAGCACAGUAGUGUCAUCUGCAGCCAACUUGCUAUUAACCC  
>N\_107  
UGCACCUGAACUUGUUGCUCUUUAACAGCAACAGUGCCC  
>N\_108  
CAGCAGUGUCCCAGUGCAUUCAUUGCCCCAUGAGCAGCAUC  
>N\_109  
UGGAUACAGAUGUCCUUUGCCUUACAGAAGCUUUGCAAUUU  
>N\_110  
AAGAAAGAAAUUCACUUGGACUUGAGCUUUGUACAAGGACA  
>N\_111  
GUAGGUGUGUGGGUUCAUUUCUGGGUCUCAAUUCUAUUUA  
>N\_112  
GGAUAUCAGUCUGGCAGUUCCUCAGAAAAUUGGACACGAGG  
>N\_113  
UUGCAGCCCCAUAGGAGGAGCAACAAUAUAAACCAACCAGU  
>N\_114  
ACACAUGAAGGGACUCAUGUCUCCAGCUGCAUAUGUAGCAG  
>N\_115  
AGGGUGGCCAUGUCAGUCAUCAUUGGGAGGAGAGGCCCUUG  
>N\_116  
GUCCUGUGAAGGUUCUGUGCCUCAGUGUAGGAGAAUGCCAU  
>N\_117  
ACAAAUGAAGAAUGAGCCAUCUUAUACACAGACUCAGUCUU

>N\_118

AGCAGAUCAUUACUGAAU AACACUAGGAGAAGGCACUUGAA

>N\_119

GAUUCUUUCCUUAAGAUUUGCUUUAAUUUUAAUUAUUUGUA

>N\_120

ACUCAGGUCUCCUUUGAGAGCAGAACUCAGUCUUAUGUGCU
