# Supplementary material for: RNAm5CPred: Prediction of RNA 5-Methylcytosine Sites Based on Three Different Kinds of Nucleotide Composition
Source: PubMed Central journal article supplement — Mol Ther Nucleic Acids. 2019 Oct 18;18:739–47. doi: 10.1016/j.omtn.2019.10.008 (PMC6859278; doi:10.1016/j.omtn.2019.10.008), 2019-10-18
Supplement: mmc3.pdf [file mmc3.pdf]

**Supporting Information S3.** The benchmark dataset Met935 consists of a positive dataset and a negative dataset. The positive dataset contains 127 true m5C sites containing sequences with the m5C sites in the center, while the negative dataset contains 808 negative m5C sites containing sequences. Each of these segments is 41-bp long.

### I. 127 true m5C sites containing sequences

>P1  
CGCCUCCCACGCGGGAGACCCGGGUUCAAUUCCCGGCCAAU  
>P4  
CCGGGUUCAAUUCCCGGCCACUGCACGUGGUUGUUUUUCAC  
>P7  
GGCCGUGGGUGUGUAGAGGCCUUGGUGGUGCAGUGGUAGAA  
>P8  
GUGCAGUGGUAGAAUUCUCGCCUCCCACGUGGGAGACCCGG  
>P14  
UGACUGCAGAUAAGAGGUCCCCGGUUCAAAUCCGGGUGCC  
>P15  
GCUGAAGGCAUUCAAAGGUUCCGGGUUCGAGUCCCGGCGGA  
>P18  
AGAUGUUGGUGGUAGUAGCACAUAUUCUAAAAGAGAACUUCA  
>P19  
AGCCAGGGCUGGGCCCCGGGCAGAGCCGCCGAGGUGCAGA  
>P20  
CUGCGGUGAGUCUUGAAGCCCAGGGCUGGGCCCCGGGCAGAG  
>P21  
UAUUUGAUCGGAUCGUGACCCCAGCCCCGCCGGGCCGACCC  
>P22  
CGCUGUGGUCCCCGAGGUCCCGGAGCUGGCCUUGCGGGGCC  
>P23  
GAGACUCUAAUCUCAGGGUCGUGGGUUCGAGCCCCACGUU  
>P24  
AGACGCCAGUAAUCAGUGCCCGGCUAGCUCAGUCGGUAGAG  
>P26  
GGUUCGAAUCCGAGUCACGGCAGGUGGUUCUAAUUGCUGG  
>P28  
UGCGUUGUGGCCGAGCAACCUCGGUUCGAAUCCGAGUCAC  
>P30  
GCGCCGCCUGGUUAGUGGCUCGCCGUGAUCGUUAUAGUGGUU  
>P43  
GCCUCACACGCGAAAGGUCCCCGGUUCGAAACUGGGCGGAA  
>P46  
CAGGUUCCGCCUGUGGUUCCGUAGUGUAGUGGUUAUCACG  
>P47

AGCGUGCUGGGCCCAUAACCCAGAGGUCGAUGGAUCGAAAC  
>P49  
GUCGAUGGAUCGAAACCAUCCUCUGCUAUCGGAGUUUUUUC  
>P66  
UUGCCUGCCACGCAGGAGGCCAGGUUUGAUUCCUGGCCCA  
>P71  
GUCGCAGUCUCCCCUGGAGGCGUGGGUUCGAAUCCACUCC  
>P75  
AGUGCCCUUGCCGAGAGCGGCUCGUUGGUCUAGGGGUAUGA  
>P78  
CUUCGGGAGCGCCCGGAUAGCUCAGUCGGUAGAGCAUCAGA  
>P84  
UUAGUACUUGGAUGGGAGACCGCCUGGGAAUACCUUGGUGCU  
>P86  
AACACGCCAGAUCUCGGAAACUAAGCAGGGUCGGGCCUGGU  
>P88  
UGGUCUUGUAAACCAGGGGUCGCGAGUUCGAUCCUCGCUGG  
>P93  
GAAGCUAAGCAGGGUCGGGCCUGGUUAGUACUUGGACGGGA  
>P95  
UGGCCGAGUGGUCUAAGGCGCCAGACUCAAGGUAAGCACCU  
>P101  
CCAUACCACCCUGAACGCGCCCAAUCUCGUCUGAUCUCGGA  
>P102  
AUCUCUGUCUACGGCCAUACCACCCUGAACGCGCCCAAUCU  
>P105  
AAUCCAAUGGGGUCUCCCCGCGCAGGUUCGAACCCUGCUCG  
>P107  
CUGCUGCCGUGAUCGUUAGCGGUUAGUAGUCUGCGUUGUG  
>P110  
GUGGAACCAUGAGAUGUUACCUAGCGUUUUGUGAGCCAGGU  
>P115  
AAGGCGUUGGACUUAAGAUCCAAUGGAUUCAUAUCCGCGUG  
>P121  
AAAUAGCUCAGUUGGGAGAGCGUUAGACUGAAGAUCUAAAG  
>P127  
GGUUUGGGUCCGAGAGGUCCCCGGGUUCAAUCCCGGACGAG  
>P131  
GUGCCUCUCAUGUACAAGGCCUGAGUUUGACUCCAGCAC  
>P140  
CCCGACGGGGAGGUGUGUAGCUGCACUUUUUUGGCGACAGU  
>P142  
CUGCGGAGCCACAGCCCAGCAGGACCUCGUGGCGCAACGG  
>P144

AACGGUAGCGCGUCUGACUCCAGAUCAGAAGGCUGCGUGUU  
>P147  
CCCGACGGGGAGGCCAAGUACGUUUUUACCAUUCUUCGGUA  
>P153  
CGUAAACGGCUGCCGAAAUAGCUCAGUUGGGAGAGCGUUAGA  
>P156  
AUGCUUUGCACGUAUGAGGCCCCCGGGUUCAAUCCCCGGCAU  
>P158  
AGGUGGCCCGGGUUCGACUCCCGGUAUGGGAACGCUUCCUU  
>P162  
UGGUCUAGCGGUUAGGAUUCUGGUUUUCACCCAGGUGGCC  
>P163  
UGGUUUUCACCCAGGCGGCCCGGGUUCGACUCCCGGUGUGG  
>P169  
CCGCGGAGGUCAGACUGGGCAGGAGAUGCCGUGGACCCCG  
>P174  
ACUUAAGAGUAUCUGUAUCGCGGCUCGUUGGUCUAGGGGUA  
>P180  
AUUUGUGGACAUCUAGGUCGCUGGUUCGAUUCGGCUCG  
>P181  
GUAGAGCGGAGGACUGUAGCCUGUAGAAACAUUUGUGGACA  
>P184  
CAGUGUGCAUCCUUCGAUAGCUCAGCUGGUAGAGCGGAGGA  
>P194  
UGACUACGGAUCAGAAGAUUCCAGGUUCGACUCCUGGCUGG  
>P195  
GGGAUCGCGCCUGUGAAUAGCCACUGCACUCCAGCCUGGGC  
>P197  
CUGGGCAACAUAGCGAGACCCCGUCUCUUUGAACAAUAAA  
>P204  
GGUGCUAAUAACGCCAAGGUCGCGGGUUCGAUCCCCGUACG  
>P209  
AACGGUUACUUGUCAUCUCCACAUGGUCUAGCGGUUAGGA  
>P215  
GUAUAGUGGUUAGUACUCUGCGUUGUGGCCGCAGCAACCUC  
>P223  
GGACUCUGAAUCCAGCGAUCCGAGUUCAAAUCUCGGUGGAA  
>P228  
CCGAGGCCGCCAGAGCCUCCCCGGGAGACCCGAGGCCGC  
>P235  
CAGUCGGUAGAGCAUGAGACCCUAAUCUCAGGGUCGUGGG  
>P251  
AACAUAUUGCAGCUGGGUAGCGUGGCCGAGCGGUCUAAGGC  
>P262

GGCCCGGGUUCGAUUCCTGGCCAAUGCAGCAGCUGAAAGCU  
>P290  
UGUCUAGUAAACAGGAGAUCUUGGGUUCGAAUCCCAGCGGU  
>P296  
UGGUUAUAGUGGUAAGCAUAGCUGCCUCCAAGCAGUUGACC  
>P303  
GACUCCAGAUCAGAAGGUUGCGUGUUCAAGUCACGUCGGGG  
>P312  
CUUAAGAAGCCAGCAGGUCCCAUGGUGUAAUGGUUAGCACU  
>P313  
UCCCAUGGUGUAAUGGUUAGCACUCUGGACUUUGAAUCCAG  
>P331  
AAUCCCAGCGGUGCCUCAACCGAGCGUCCAAGCUCUUUCCA  
>P332  
AUUCUCAAAACUUUAAAUGGGCAAGAAGCCCAGCUAGCUCAG  
>P333  
CAGUGCGAGCGGAGCAAUGCCGAGGUUGUGAGUUCGAUCCU  
>P338  
GGUCACGACCCUCAGGCUUCAAUCUGAGGGUCCAGGGUUC  
>P348  
CUCUUCGAAUGCACUUGCGGCCCGGGUCCUCCCAGGGCUA  
>P372  
GUGGUCUAGUGGUUAGGAUUCAGUGCUCUCUCAUAAAAUAA  
>P373  
AGCACUCUGGACUCUGAAUCCAGCGAUCUGAGUCACGGCAC  
>P375  
AAGCGGUUACCUCCUCAUGCCGGACUUUCUAUCUGUCCAUC  
>P376  
AGUUCUUUAAUUGAAACAAGCAACCUUGUCUGGGUUGUUCGA  
>P377  
AGCAACCUUGUCUGGGUUGUUCGAGACCCGCGGGCGCUCUCC  
>P378  
AACCUCUGGGCUGGCUUUAGCUCAGCGGUACUUCGCGUGU  
>P380  
CUUUAGCUCAGCGGUUACUUCGCGUGUCAUCAAAACCACCUC  
>P392  
AGUGGUUAUCACGUUCGCCUCACACGCGAAAGGUCCCCGGU  
>P401  
GAUGUAGCUCAGUGGUAGAGCGCAUGCUUUGCAUGUAUGAG  
>P410  
AGUUAGAAUACAGACAUGGCCGCCCGGCUAGCUCAGUCGGU  
>P445  
AGGACUGUAGGCUCAUUAAGCAAGGUAUCCUAGGUCGCUG  
>P450

AGCAAGCCCUCUUAGCGCAGCUGGCAGCGCGUCAGUCUCAU  
>P451  
CAGUCUCAUAAUCUGAAGGUCCUGAGUUCAAGCCUCAGAGA  
>P454  
UCGCGGGUUCGAUCCCCGUACUGGCCAGACGUGACUUUUUA  
>P468  
AGAAGAUUCUAGGUUCGACUCCUGGCUGGCUCGGGUGUUAA  
>P475  
AGGAAAUGCUAGUUCAGCUUCAGGUUCCAUGGUGUAAUGGU  
>P498  
AAGGCGAUGGACUAGAAAUCCAUUGGGGUUUCCCCGCGCAG  
>P510  
CAGACUCAAGUUGCUCUACUCCCAGGUUUGGGGCUUCUGGUC  
>P511  
GUGGUCUAAGGCGCCAGACUCAAGUUGCUCUACUCCCAGGUU  
>P514  
ACUGCUUCCUGUGUUCGGGUCUUCUGGUCUCCGUAUGGAGG  
>P517  
AAAGGUCCCUGGAUCAAAACCAGGCGGAAACAAGUGGUUAC  
>P521  
UCAAUUCUCACUCCCACCAGCAGGGUUGUUUCCGUAGUGUA  
>P522  
GUUAGCUCAGUCGGCUAGAGCGUGGUGCUAAUAACGCCAAG  
>P529  
AUCCUGGGUUCGAAUCCAGCGGGGCCUUGAUUUCUGUACC  
>P532  
UGGCUUAGCUGGUUAAAGCGCCUGUCUAGUAAACAGGAGAU  
>P540  
AAAAGAAGAAGCUUUGUAACCGUUGGUUCCGUAGUGUAGU  
>P544  
AAUCGCUAAGAACUUGGCCCCAUGGUGUAAUGGUCAGCACU  
>P578  
CCCAGCGGGGCCUUGGUUGGCAAGGUCAGUGUGCCUUUCUG  
>P579  
AAGCCAACAGAACUCUCAUGCGGUCAGGGGGUGUAGCUCAG  
>P582  
CAUGUACGAGGCCCCGGGUUCGACCCCCGGCUCUCCAGUU  
>P599  
ACCUCCAAGUGAUGGUUUCUCCUGGCAGUUCUCAAGCGAC  
>P605  
CGAUCCCCGACACCUCCAAGCGAUGGUUUUGCUCUGGUAGU  
>P610  
CAAUCCCCGGCACCUCCAUUCUUUUGCUUUUAAUUUUUUU  
>P621

UGUCCCAGGUGUCAGGAUGGCCGAGUGGUCUAAGGCGCCAG  
>P633  
UGAAGGUCCUGAGUUCGAACCUCAGAGGGGGCAAGGCGUCU  
>P651  
GAACGCGCCCGAUCUGGUCUCAUCUCGGAAGCUAAGCAGGG  
>P655  
GUCAGUUACAGAUCGAACUCCUUGUUCUACUCUUUCCCCC  
>P657  
AUUACACUGUCCUCCUAUGACUGGGUGUAUGGCUCAGGGGU  
>P663  
AGGGGACGCCGACACACGUACACGUCCCUUCGAUAGCUCAG  
>P668  
UUAGGUCGCUGGUUCGAUUCGGCUCGAAGGAGAGACACC  
>P671  
UAUGUAUACAUGUGCCAUGCCCGAUCUCGUCUGAUCUCGGA  
>P674  
AAAACUUAAAACUUACAGUCAGAGGUUCAAUUCCUCUUCU  
>P675  
AGAACUGCUAACUCAUGCCCCAUGUCUAACAACAUGGCUU  
>P779  
UACUCAGGUAUCGUAAGAUGCAAGAGUUCGAAUCUCUAGC  
>P781  
CUGUUGGACGGUUGUCCGCGCGAGUUCGAACCUCGCAUCCU  
>P785  
CACACUAGUAAUGUGGAGAUCAUCGGUUCAAAUCCGAUUGG  
>P788  
GCGCUUGUCGCGUGCCAGAUCGGGGUUCAAUUCCCCGUCGC  
>P789  
CAGAUUGCAAUUCUGUUGGUCCUAGUUCGAUCCUGAGUGC  
>P796  
AGGGCUCAUAAACCUGAUGUCCUCGGAUCGAAACCGAGCGG  
>P802  
AAGCAAGGAUACCGAAAUGUCAGGGGUUCGAGCCCCUAUG  
>P813  
UUUAAAAGCAACGCGACCGUCGUGGGUUCAAACCCCACCUC  
>P814  
UCACUACGAAAUCUUGAGAUCGGGCGUUCGACUCGCCCCCG  
>P819  
GGUCAAGAUUUCUGGAGGUCCUGUGUUCGAUCCACAGAGUU  
>P836  
AUCGUUGUGGCCGAUGAAACCUGGUUCGAUUCUAGGAGAU

## II. 808 false m5C sites containing sequences

>N1  
GCGCUGCGUGGCUUGGAAGGCACUGGGGGGCGGGGGUGGAG  
>N2  
CGAGGCAUGACUGAGCUGGCCUCAGCCCCAGGUCCUCCU  
>N3  
GGUGGUUAUUUAGUUGAGGGCCAGCAAACAGGUGUCACCUC  
>N4  
CGUCCCUUGCCAAACCUGUGCUGUGGGCCAGGCCUGAGCUG  
>N5  
CGAGGACACCCCUUCUUGGCUCUGGCUGUGGAAUGUGGAGCU  
>N6  
GAGUAGGGAUGGGGCUCUGCCAGGAUGUCUCACGUCAGGGG  
>N7  
CUAUAGUGAGAGUGAGCACCCUUCGUGCCCCUCCGAGG  
>N8  
UGUGCUGGGCCUGAGACAGUCACAGCUUCCCCUGGGCUCCU  
>N9  
ACCGCGUCACUCCCCGGGGCGCCGAGUUCGCGGCCUGGCA  
>N10  
CGACAGCAGUGUCUCCUUUACCCUCCUGAAGGAGUGUGAGG  
>N11  
GGCCCAGAGAGGGGCAGGGCCCGCCCAAGGCUGCACAGUGA  
>N12  
GCCCCUCCUCCUGGUCACACCCUGCCCAGGAGGGGAGCCU  
>N13  
GUUGGGGCCUCUCUGGGGUGCACAUCAGCCCCUCCAUCCUC  
>N14  
GGAGUGUGAGGUGGCACUCUCAUCCCCACCCAACAGGAGGG  
>N15  
UGAGGGACGGCCCUUGUCUGCGGUCAUCCCUCCCCUCCUGA  
>N16  
GCUGGCAGCAUUCCAUCUUCUCUGUGGUCAGUUCAGGGUG  
>N17  
GGUGCGCGGGGUGCAGGGGACGCCGCUUGAGGACUCCAGC  
>N18  
CCAGGAUGAGCAAGGCUGGCCAGCAUCUCUGAGUGAGUGG  
>N19  
CGGGGAAGCGUUCGCAGAAACUACAGGGUGGUUAUUUAGUU  
>N20  
UUGCCAGUUGUCCUCCCCAGCAGUUGUGCGCGAGGUCCAUC  
>N21  
CUGGGGAGGGGCGACACACACUGGUGGUGAGUUCAGGGCAA  
>N22  
CCCACGCCCUACCCGGGGGCUCCCAUCCUGGGGCUGGGAC

>N24  
CAGCCCCAGCCUCUGGGGCCCCAGGCCUGGGCAGGGGCCUG  
>N25  
CAGGCCCAGAUCCGGGCCCCCUGCGCUGCAAGGCCACCUCA  
>N27  
AGGAGGUGUCUCAGGGGCUCCUGGCUUUGUCCUGGGAGUAG  
>N31  
CAGGAUGGAUGUGAGAAAAACAUAACGCCCCCAAACCACA  
>N33  
UGUGGCACCAACUAGGGCUACAGAAGAUGGAAUUUGACCUC  
>N34  
GCAGCCGCCGUGCUGGGCACCCACCUUGGGAAAAGGUCGCU  
>N36  
ACAGCCCCUACUCUUGCUGCCCUGGUAGAAGACGAGGCCCA  
>N37  
GGCCCCGGCACCCACUGUCCCCUUGUGGGCCCCUCCUCCUGG  
>N38  
UUUCUGCCCAUCCCUUGAGCCUCAGAACGUCCUGGGGUGAA  
>N39  
GAGUAUGAUCUGGAAGCCCCAGGGCCGGCAAAGGGGUGCA  
>N40  
CCACUCAGGUGCUGUGGGUCCUUGGUCCCUCCCGGCCCCGC  
>N41  
CCCAGCGAGGCUCUGAGAAGCCGGGACACUCUGCCCAGGGA  
>N42  
GGCAGCUGAAGACUCUGCAUCCCUUGAGACGGUCCCUGCC  
>N43  
CUGUGCACAUUCUUCAGGACCACAGAGGGGGAGCAGCUGCU  
>N45  
GGUCCCGGGCUGGGCUUCCCCGUCCACCAUCCAGCUGCCC  
>N46  
UCGAUUUCUGUCCUCAUCUGCGGGGCCUGGGAAGGAGCUGG  
>N47  
UCCCCACUGGGGAACCCCAACCCGGACCAGGAGAUGGGCCC  
>N48  
AAUACUCAAUAAGGAAUCACAUACAACAUAAGCAAAGAU  
>N49  
CACAUAGCCCCUCCAUCCUCUUCACACUUCCUCUUGCCA  
>N50  
UAAUCGGGCUUCAACCACACCGCUGGGGAACAAAAUAAAC  
>N51  
CUGCCCCAACACCUACAGCCCCUGCCUCCUUCUGAGGCU  
>N52  
GUCCCGACACCAUGGAUGGGCAGGGAGGCCAUCCUACCAA



>N53  
GGGGCCCCUUCCUCUGCCGCCUGGACCUGGGCUGUGGCAC  
>N54  
GGUCCUGCCAGGCAGCACCCAGGGGUGCAGUGCACAGUC  
>N55  
CUGCGUCUGCCAGGCAUGCCCUGCAUUCAGGCAGAACUCGA  
>N57  
GGAGGGGCUCCUGGGAUGACACCGUGGAAGAGGAGAUGCC  
>N58  
GACCCAGAGGACCAGAUGUGCCCCACGCCCCUACCCGGGGG  
>N60  
GCUGUGGCAGGGAGUAUUUUCUCUAAAAACAGGAUGGAUGU  
>N62  
UGGGACAGAAGAGGCAGUCACAGCCGUGUGGCCAAUCGAUU  
>N63  
GCAGGGGUGGGUCUAUGGGGCCCGUGUGCAUAGGGUUGUGU  
>N64  
UGCUCUCGCCGUCAUAAACCCGCGUGCACCGCGUCACUCC  
>N65  
GAUUUUUCAUAAACCCAAACACAAAACACAAUAAAGUUCU  
>N67  
CCAGGCUUCCUGACUGCCCGCUCCCUCUUCACGUUGCUUCU  
>N68  
CAUCUUCUCUGUGGUCAGUUCAGGGUGAGGGAGCCUCCCGC  
>N69  
GGGCCACCUGGGUCCCGGGCCUCGGGGGUGCCUGGGACAGC  
>N70  
GGCUCUGGAGGCCUGGGAGGCCUGGGGAGGAGUCCUUGAGA  
>N72  
CUCUCAUUUCUUUCCUCUUCUGCCCCGCCCCUCAGCAGAA  
>N73  
GGGCACUAUGACAGGGGGGACAUUGGCAUGAGUUGUGGGAG  
>N76  
GCUGGGCAACCUGGGACUGGCCCCUAGCCCCUCUGGGUCU  
>N77  
AAUGGAGAUGACACACUUUGCACUGAACAUGUACUGUGUAA  
>N78  
CAUUUCUCCAGACUCCCGGCCUCCUAAUUUAUGUGCUGCU  
>N79  
GGAACCACGUUGGGGGCCACCACAGGGCAGAUUGGUCCCGG  
>N81  
UUACUCCCCUGGGGUUUUACAGACCACCGAAGCCCUGCGG  
>N82  
UGGGGUGGCUGGAUUUGGGGCACGGAUGCCCAGGUGGGCUU

>N83  
GAACCGGUGAUUAUCAGAGUUCUUGGUGGGGAAAUCUGCCC  
>N87  
GGACGCCGCUUGAGGACUCCAGCAGCGUGGGACGUGAGCA  
>N89  
AAAUCUGCCCAGGGUAGUAGCUCCAGAGAGCAGAGUCACAG  
>N90  
AGGAUGUCUCACGUCAGGGGCUGCUCGGGGCCUGCGGGACA  
>N93  
GUGGAAGGUGAUGCCGUGGGCCCAGGGCUGGCUGCGUCUGC  
>N95  
UGGGACCCCGGGACCGGGUGCUCGCUGAGGGACGGCCCUUG  
>N97  
CGGGGACCUCGGCGGGUCCCGGGCUGGGCUUCCCCGUCCC  
>N98  
AUUUGACCUCUCCCCUGGGCCACCCACCCAGCCCCAGCCU  
>N99  
GCCCAAGGCCUGCCUCCCGCUGUCUCUCCCAUGGCCUCUC  
>N100  
GUCACAGCUUCCCCUGGGCUCCUCUUCUCUCAUUCUUUCC  
>N101  
GCAGUCCUCCCCGGUGCCGGCCAUCCGGGGUGCGUUAGGUA  
>N102  
UCCCCACCAACAGGAGGGGCUCCUGGGAUGACACCGUGG  
>N104  
CGGCAAAGGGGUGCAGGGUGCUGGGGCUGAGGUAGUCCGGG  
>N108  
UCUCAGCCUCACGUGAGCAUCCACGGACACGUGGGGCCCCA  
>N109  
AAACAAUAACGCCCCAAACCACACUAAUAGGGUGGGUCGC  
>N110  
GGUGGGCUUCUCCUGUAGGCUCGGAAUGGGGACUGCAGAG  
>N112  
AGCUCGAGCGGGUAGGCGCCCGUCCGUCCCUUGCCAAACCU  
>N113  
CAGCCAGGUGCCAUGCAGGCCUGGACAGCUCCCCACUGGGG  
>N114  
CCCUGCAUUCAGGCAGAACUCGAGGGAGGACUCAUCUCCAA  
>N118  
AGUUCAGGGUGAGGGAGCCUCCCGCCCCUGUGGUUCCGAGG  
>N120  
UGAAAUAUAAUCGAAAUAUCUAAAUAAGGAAUCACAUAACA  
>N121  
UCGGGGCCUGCGGGACACCUCCUCCUACUUCCCCUGGGG

>N122  
UGGCCUGGGUCCCAGGAAUCCGGGAAAUCUUUCCUAGCUA  
>N123  
UCCAAAUCACUACGCUACUUCUGAAAACCUGUACUUGAGG  
>N124  
CUGACAUGGGCUCGUCCUGCCAUGGCCCAAUAAAUCUCGUG  
>N125  
AAGUUGGCGGGUAGCACUGCCCUGCACUAGACACACAUUUA  
>N126  
GGACAGUUCUCCACCAUGGUCAGGUCUGAGCGAGGGCAGCU  
>N127  
CUCACCCGGAGUCCGUGGUUCACCUCGGCUCACUCUUGGCA  
>N128  
GUGGCCACGUUGUCCAUGUGCCCUGUACCUCGUGCUGCUGG  
>N129  
AACAGUGGGACCUGCACAUCCGAGAGUCCGAGCUUUACUGU  
>N130  
GCCUCGGACCUCAGGGGCUUCCUGGUCGCAGCAGGCGGCC  
>N131  
ACUUAGGCAGAGAAGAGGCCUGUGUCCCGGGUGCCUGGUG  
>N132  
CACCAAAAUGUCUCCAACGCAGCUGCGUUGUUCACCCCC  
>N133  
CCCAGUCUGGGUAACAAGAACAACAUAUAAAAUCCCCGGC  
>N134  
GGUGCCUACCCAGCAGGGGCCUGCCUGUAGGAGCAUCACC  
>N135  
UUUGGGCAGGUGUUUGAUGACGACACACCCCCCAUUACAG  
>N136  
UUGGGGCAUCUUGUGCACCUCUUGGCUCUCUGCUCUUUGAC  
>N137  
AGGGAAUCUGUGAACCUGGGCAGCCCCGGGGCUGGGCUCA  
>N138  
UCCAGAUGGGAAAACCAAGACUCAGGUGGUUGAGUGACGUG  
>N139  
CCACAGAGGAGUUUCUGUCCUAAAAUCCCCUCUGCUC  
>N140  
AAGCCAAGCUAGAGAGGCCUCAGUUUCCCCUCCGUCCUCC  
>N141  
ACACAACACGGAGCGUUUUGCUUGUAACUCUGUGGUUGGGG  
>N143  
UCUCUCCUUUAUCCUGCUGCAUGCGGCAGAGGGACAAAUG  
>N144  
CUGCCGAGCUGGACACUGUCCAGCCUGAGCGUGGCCACGUC

>N145  
GCAGGGAGGUCUGAGGCUUCCCCGGUGGGGACUAAGGCUGU  
>N146  
ACACCCCCCAUACAGCAGCCCACAGAGGAGUUUCUCUGU  
>N148  
AGGUCUGAGCGAGGACAGCUCCCCACCACGGUCAGGUCUGA  
>N149  
CCCAAUUUCUUCUUAAGUCACCGUCAGAGCCCACGAUACCC  
>N150  
GUUCCCAUAUGGCCCCUGCCCCACCCACGCCUCCCUCGUG  
>N151  
AGUGUUCGCUGAAGCUGUGUCUAAACCUCUGACUCAGUAAG  
>N152  
CACCAGGUCUCACUGGAGGACGGGCCGGCUUCUCCCAUGCC  
>N153  
CUCUGUCCUAAAAUCCCCUCUGCUCCGCCACUCCUCCCU  
>N154  
AUUUGUAGACUCGGCGAGUCCUUUCUUGCCUCCUUUCCUGA  
>N155  
GUUCUGGCCUGGCCUUUGACCUCUGUGGGACCCAGUCCUUG  
>N156  
GUGUCCAGGCUGUGCAGUUGCUGGGGCUAGGUCCGCUCGCU  
>N157  
GCAGUUGCUGGGGCUAGGUCCGCUCGCGUCCUUGUGGGGCA  
>N158  
UAUGUCUCCACGCACCAGGGCGCCUGCCUUUAUUCACUCUC  
>N160  
UGCCAGGCUGAACCCCCUCCCCAAAGCUGCGUCAGAGGACA  
>N161  
UAGAAAGGUGGUUUGAAAGGCAUGCUGUGCAUUCACAGUUU  
>N162  
GUCCAGCCUGAGCGUGGCCACGUCGUGGUGGUGUCCAGGCU  
>N163  
ACAGAGGGAGGGAAGGGCUGCACAGCAGGGGCUCAGCGCAU  
>N164  
UUCCUUUCUUAUGGGAUCAUCAGAGACUUUUAUGCUCGUCU  
>N165  
CUGGAGAUACAGCCAGACACCUCCACACAGUGGCUGAUUCC  
>N167  
AAAUGACUUUCCUGACCACACAUCUUUGUUAAAACAGCACU  
>N168  
AGGGCGCCUGCCUUUAUUCACUCUCUCAGUUUAAAAUACAG  
>N169  
AGACCUCGUGGGGGCUUUUUCUCCAGCCCAUCCUCUCCCUG

>N171  
ACGGGCCGGCUUCUCCCAUGCCCUGGGUCCUCCGCACACUC  
>N174  
AGAACAAACAUAUAAAAUCCCCGGCUGAAGUUGGCGGGUAG  
>N175  
AGAAUCCUGACUGUCGAAGCCCCCAAUAGUUCUGUAGGAU  
>N176  
UCCACAACAAGAUGAGGUGCAGCCACAAUGCGUGUCUUGU  
>N178  
CAUGUGGGUCCGGGAUAUGCCUGGGGUCAUGGGCCCCUCCC  
>N180  
GUCUUCUUCCAAUUCGAUACUCUCCUGAGAUUCAUCUGUG  
>N183  
CUUCAGGUUCCGUCUGAUCCCAGGUGGGUGGGUGGCUCUGA  
>N184  
GUCCUCUCAGCCCUAAAGGUCAACUGUAACAUAUUUUAGAAU  
>N185  
ACCUCUCCACGUAGUCAACACAUAAAAAUUAAGCUCUGCCA  
>N186  
CGUGGUCUGUGGGGAGAAUGCUCUGGGCCUGACUUGAGUGU  
>N188  
AGAUCAGAGUACAUAUAAACACACAUAUUAGCUUUGGAAAUGU  
>N189  
CUCUCCCUGAGCUUGUUUAUCAAGAAGAUGCUCUUCUAGAGUG  
>N192  
AUUUUCAUAUGACUAGCAUCAGGAAAAAAGUCAUCACAUAU  
>N194  
CCAGUUCCUGGGCUUCCUCCCUGUUCUUCAAGGAGAGACUG  
>N196  
AACCUCUGACUCAGUAAGGUCUUUUUAAAGAUACAGCCAUAU  
>N197  
CACAAACAGUUUUAGAAAUGCUCUUGCUCUUCUGCCAUAUUAU  
>N199  
AGGGUGGGUGCAUGGAAGAGCAUUGCGGUAUCAUGAGAGGU  
>N201  
AAAAUACAGAGUUAUUCACCCCUGAGCUUCUGUGCACACAA  
>N202  
CUGUAAAAUGUGGCUCUGUGCCUUAAGAAUGACAUAUGUUAU  
>N203  
GUCCUUUCUUGCCUCCUUCCUGAGUUCUGUGUUGUCUUAU  
>N204  
CAAGCGUGGUCCGUUUCACCCCCUCCACCCUGACAUGCAC  
>N206  
GAUGCUGUGAGGGCCUGUGGCUGCCUCACGUCUGCGGAAGA

>N207  
UAAGUGAGUAUUUCCUCUCUCCUUUUAUCCUGCUGCAUGCG  
>N209  
GUGGACAGGUCGCGAGGACACCAGGUCUCACUGGAGGACGG  
>N211  
GAUUUUAUUCAAGAUUAUUUCAAGAUACAACUGGCAGUAA  
>N212  
CAACGCAGCUGCGUUGUUCACCCCCACAGUGGAUAAGAGU  
>N214  
GAGGCUUCCUGGGAGGGGGCCACGCUGAGGAAGCCCGUGUG  
>N216  
GCUUUCGAGUUGUCAUUCUCCCGCGUGGUCUGUGGGGAGAA  
>N218  
UGCUGGAAGAGUGAUACGGACUCUGGGCAAUAUUUGUGGA  
>N219  
AAAUCCCCGGCUGAAGUUGGCGGGUAGCACUGCCCUGCACU  
>N220  
CCGCCCACUCCUCCUCCUCCUCAUGAACCCUUGGCAAAC  
>N224  
GGGCCGGACAGAGCUGGGGGCCCCUGGACAGGUCGCGAGGAG  
>N225  
CUGCAGAGAGGGGUUGGUCUCCUUCCUCCUUCAGGUUCCG  
>N228  
ACACAUCUUUGUUA AACAGCACUGUAUUCAGUAGAGACUG  
>N229  
GCCUGGUGAGCAGCGGCUGACAUGGGCUCGUCCUGCCAUGG  
>N234  
CUGAGCUUCUGUGCACACAACCCAGUGUUCGCUGAAGCUGU  
>N235  
CCUGAGUGUACUUGGGAGGUCAGAGGCUUCCUGGGAGGGGG  
>N240  
ACUGAAAGCACAUUAUCAUGCUGGAGUCGACAGUUUCUGUC  
>N242  
AUUUAGUGCAGCUGAUGGACCAACACGACACGUCAUCCUCA  
>N243  
UUUAGCACAGUUUAGGUACCCAGCAAAAUUAAGUGGAAAG  
>N244  
UGCCGCAUCCCCAGCCAAGCUGCCUGGGCCCCCUGAUGC  
>N245  
UUUUGCAUAAAAAGGGAAUCUGUGAACCUGGGCAGCCCCG  
>N246  
UCUGUGGUUGGGGAGUACAACAUCCUCUAAACCAGUGACCU  
>N247  
UGCUCUUGUGGGGGCAGUUCAGAGACAGAAUCCUGACUGU

>N249  
UGAGGGAGGUGUGUGGAUUUCACAAACAGUUUUAGAAAUGC  
>N253  
CUGGUUAUCCCAUUUAAGUACAUCGUUUGCUCUCCUUGUGGGG  
>N254  
CACAGGACCAUUGACUAUCUCUAUAGUUUUGCCUUUCCAG  
>N255  
CCCUCGUCUCCUCCUUUUGCCAGGCUGAACCCCUCCCAA  
>N257  
ACCGUCAGAGCCCACGAUACCAUUGCCUCGGACCUCAGGG  
>N262  
AAAGACUCACAGGAAUGUGCCUAAUGGAAACCCAGUCUGGG  
>N263  
GAAAAAAGUCAUCACAUUUUCAUUUAGAGAACAGUUAUUGU  
>N267  
UGUCUGUGCUGGGUUUUGGCCUUGCUCAGUGGUGUGCAGGG  
>N276  
AUGUGCAUUUACGGUGCCUUCGUGUCUUUCCUGGCCUAGC  
>N277  
GCUCACUCUUGGCAUUGUCACUGCACAGGUUUGGGCAGGUG  
>N279  
GGGACCCAGUCCUUGAAAGACUCACAGGAAUGUGCCUAAUG  
>N281  
GUGACUUAAU AUUUUAGCACAGUUUAGGUACCCAGCAAA  
>N282  
GAAAAGAAGGGGCUGGUGGGCAGGGAAGUGGGAGAGGUGGU  
>N285  
AAAUAGUUCUGUAGGAUGGUCUGUCUGUAGGGAUGGCCUGG  
>N286  
CUCCACACAGUGGCUGAUUCCCACCCACCAAACAGCGUGCC  
>N288  
CCUGACUUGAGUGUCAGGAGCCUCAGAGGAGACACUGCCG  
>N292  
AAACCUGUACUUGAGGAAAACCUAGAGAAGGUUUUGGGGCAU  
>N293  
UUGGUGUUCCCGCUGUGGUGCCUACCCAGCAGGGGCCCUGC  
>N294  
GACCAGCCUCUCCGCACAGCCCCUCUGUGAUCUCCCAU  
>N296  
CGGUGGGGACUAAGGCUGUCCCGGUGGCUAGCAGUGGCUCU  
>N298  
CCCUUCACCGUGGAAAUUAUCAUGGCUCCACCCUCAGAUGU  
>N299  
CUGGGGUCAUGGGCCCCUCCCAAGUGCUUCCUGUGAGUG

>N300  
UGCAGCUGACGCGGCAGCAGCAUUCUUUGUUGCUGGAAGAG  
>N301  
AGGUCUUUUUAAAGAUACAGCCAUUGCCAGGAAUUUGAUUA  
>N303  
AUCACCUGGUGCCUGGGAAGCUGCAGGCUCCUGAGUGUACU  
>N304  
CCACCCACCAAACAGCGUGCCCAGGGGAUUUCUGAGAAAAU  
>N305  
CGGCCAGUAUAGUCUCAGUCCCAAUUUCUUCUUAAGUCAC  
>N306  
GAGAGUCCGAGCUUUACUGUCCCUUCACCGUGGAAAUUAUC  
>N307  
AGGCGGCCAGUGGCUUCUGCCGCAUCCCCAGCCCAAGCUG  
>N309  
GCCCUCCUCGUGACCCAGUCCCCUCCAGAGCUGUGCAUUU  
>N310  
UGGGGCCCCUGGACAGGUCGCGAGGAGGCCGGGUCGGACAG  
>N311  
CUUUGCUCUCUGCUCUUUGACUUCAGCUGAUUUGUAGACUC  
>N313  
CCUCCACCCUGACAUGCACACACCUGGCCCCUGCACACACC  
>N314  
GUGGAAAGUGCAGACAGUUCCTCAUAUGGCCCCUGCCCCACC  
>N316  
GGCCUCCACACGCGGCACCUCCGUCCUGCUGUCUGGAUGG  
>N322  
GAGCCACCAUGGCUGGCUAGCUAUCCCCUUCUAAAGAGGU  
>N323  
ACCUGUGCUGCCCAGGAGUACAUAUGAUAACUGCUGAAAA  
>N324  
GGAAGGGGGAAGGAUGGAGCCAGUAUUUCUUGGCUCUGGUA  
>N325  
GUGUCACCUGGGCCUGACUCUAACCGCCACCUCCAUGUCC  
>N326  
GUCUCCCACGCCUGCUGUUACUGGUUACCUUUAGAAGGAGU  
>N327  
UGGGCGGGGGGUCUGUGUACAAGGCAAACGUUUGUGCUGG  
>N328  
UUGAGGUGCAUGGCAGGUGACGUGAGUGGGGCCGCUACAGA  
>N329  
AGCGAUUCUCCUGCCUCAGCCUCCCGAGUAGCUAGGAUUAC  
>N330  
AGAUUCCAGUACAGAGCCCCAAUGCUGGGCUGAGAUGCAC



>N331  
AUGGGAUUUAUAAAAUAGUACUUUACUCACAGGUUUGUUGU  
>N332  
AGUAUUUCUUGGCUCUGGUACAGCUGGUCUAACAGGGUUGG  
>N333  
UAAAACACAAGGGAAAAUUUCUCUUGUUUAAAUUGCUGGC  
>N334  
GGAAUGCCAAGAGUCCACAACAACCUGAUCCAUGAUAGCCC  
>N335  
CCCUCUUUCAUGCCCGGUGCUCCCUGACUCUGCUCCUGGA  
>N336  
UCAUGCCACUGUAAUCUAGCCUGGGUGAUGGAGUAAGGCUC  
>N337  
UCCAUGCCUAACGUCAGCGCCUGGGGCAGCCACUCUCCU  
>N339  
UUGAAAUGCUUUUGGAGGAACCAGCUACCUUCUAAAUGAAA  
>N340  
UCAGGGGCGCUGCUCCUUAGCCUGGAAGCAUGGGAAUCUGC  
>N343  
GCUGUGCUUUGUUCCCUAGCCCGGCCCCUGGAAUGACUCAC  
>N344  
GUAUACAGACCUCAUAUAGGCAAAACCAUGAGGUCAUCAA  
>N345  
GACCCAAGCAGCCGAUGGUCCUAAGACAGGCCAGCUUCCU  
>N346  
AGUUGGCUCUGUAUCUCAACCAUUUACCAUAGUAAAGUU  
>N347  
GCCCAGGCUGGUUUCAAACUCCUAAGCUCAAGCAAUCCUCC  
>N348  
GAGUGACUGGCACAUGGAGGCUGAUGAUUAAAUGUUUGUUG  
>N349  
AUCCUGACCUACUGACUGAUCCAUGCAGGUUGUACUGUCAC  
>N351  
CUGGACAGUCAGUGGGGCCUCCUGAGAGCCAGAGGUACGGU  
>N355  
GGCAACUGGUUGCUCAGGCUCAGGGGCUCCAAUACAUUUU  
>N358  
CCAUGCAGGUUGUACUGUCACACAGCUCACAGAACCAAAUC  
>N359  
GAUUUAACCAUCCUACCUUCCCUCUUGGGUAUGCAGCAA  
>N360  
GGCAUUAGUGUCUCCCCUCUCCCAAACUACUCACAGAAGU  
>N361  
CAGGCUAGAGUGCAGUGGUGCCAUCUCGGCUUACUGCAACC

>N362  
GAACAGAAAAUUCUUUUUUGCUACUUUAUUAGGUUAAUACU  
>N363  
UGAAAAUCAGAGUAGUGAGCCUUUCAAGGGCUAAGGUCCAU  
>N367  
CAGUGGCAGGUGGUGCGUCCCCAAGGGCUCCCUUUGGCAAG  
>N369  
GGAGGCAGGAGGGAAACCAACUGGAGAGGAGGGUGUGUGUG  
>N370  
AUCAAUUUCCGUAAUAUUUACAUUGGGUGUUUUAUUCUCUG  
>N372  
UCCGGGUCAAAGGGUAGAAACAAUUUAUGGCAUUUGAUUUG  
>N373  
UCUAACCGCCACCUCCAUGUCCCUCAUCUUUCAGGCAUUAG  
>N374  
GGGACCCACGUCAUCUACAUCCUGACCUACUGACUGAUCCA  
>N375  
CAAGUAGGCCUCAAGGCCAACUGUCAUCAAUUUCCGUAAUA  
>N376  
GAAAAGUGGAAAAGUGGCUCCUUUGGAGGGUGGCAUGUUAG  
>N377  
AACUCCUGGGCUCAAGUGAUCCGCUGACCUUAACCUCCCAA  
>N378  
UGGCCAACAUAGUGAAACCCCGCCUCUAAGAAAAACAUAAA  
>N379  
GCUGAAAACAAACAGCCAAGCAAACUUGAAUGCCUGAUGUG  
>N381  
CCUCCUCUCUCUUUCCUUUCCUUCUUUUUCCUUCACUUCUUC  
>N382  
UUGGGGAGCGAAGAUCUGUCCAUCACCUUGCUUCUGCCUGU  
>N383  
GAGAGGUGAAAGGCAGUUGGCUUGAGUGUUGCAGGAAGGAA  
>N384  
CUUCAUGAGAGCCUCAGGUGCCUAAAUGACUCUCCCUUCU  
>N386  
CCCAGUAAAUCACCAUUGCCUGCAUAUCCCGGAUCUUCAA  
>N387  
AAAAGAAUGUAUUUACUUAGCUAUUUUUUGCUUAUUGUUCA  
>N389  
GCAUGGGAAUCUGCUAAGCCCCUGGGUAGCCCAGCUUGAGG  
>N391  
CCCAUAGUAAAGUUUAUCUCCUCUCCUCUCCUCUCCUUUC  
>N392  
GAGGUAAGCCUGCCUGAGUACAAAUCCCAUACAAAAGAAU

>N393  
ACAGGGCUCUUUAAAGGCAACUGGUUGCUCAGGCUCAGGGG  
>N394  
UGCCUAAAUGACUCUCCCUUCUUUUGGUAUAUUCUAG  
>N395  
GGUCUGAAGGACCUGCCUCCCCAGGGAUUCUCAUCUGGGUU  
>N396  
GCUGUUUUCUAUUAUCUGAACAACUUAACCUAAUUAAGCU  
>N397  
UAAUCAAGCAGAGCAUGGGUCCUAAACCCCCAGCUGCCGGG  
>N400  
UUGCUGAGGUGCUCAGCUAGGCUCACUCACUCUAAUUAAGG  
>N401  
CAAAUAUAUGAAGUUACAUAUUUUGAGUUUUUACAUGUA  
>N403  
GUGCCCUUAGGGGAUCUCUCCUUUGGGCUAAGGUCCUCUGA  
>N404  
UCUCGAGGGAAUGAGUGGGGCAUAAAAUUCUGUUUCUCAG  
>N405  
GUCACUAGUCUGUAAUUUUUCCUUUCCUCUUUCUUUUCCCU  
>N406  
AGAUGGCAGGCCAGUCCUAGCUGUGCUUUGUUCCCUAGCCC  
>N409  
UAACUUUCCUCUGCCUCCCCACUUAGUCGUAACCCUUGUG  
>N410  
AACACCCAGCUGCCGGGAACCACUGUCCAGGCAGUUCUCG  
>N411  
UUAAAUUGCUGGCUAGUUUCCACCUCAUUCGUAUUGACUU  
>N412  
UGUCCAUCACCUGCUUCUGCCUGUCGCCUCCACGCACCCC  
>N413  
CCCAAUGCUGGGCUGAGAUGCACUUGCUAGGUGCUCAGCUA  
>N414  
UUAUGAAAUGAAGAGUUAUUCCCGAUCGAAAAAAUUCUUUG  
>N415  
GUGUCUCUGUGCUUCAGUUUCUCAUGUAUAAAUGGGAUUU  
>N416  
UAUCUUUCUGUAUUUGAUUACUAGUUUAUUAUUUUUUUG  
>N417  
UGUGCUUGUGCCUGUCCGUGCUUGAGGUGCAUGGCAGGUGA  
>N418  
CUGGGAUUACAGGCAUGAGCCACCACUCGGCCCCAGUAC  
>N420  
ACUCCUCCUCCUUUUUCCUUCUAUUGUUUUAAUGUUCG

>N421  
UCUUCAUUUAAAGGGAAAAUCUGUAAAUGUAUACUCUGUCU  
>N428  
AGCAGUUUUCUUAGCUGUUCCCUAUUGUGGGGCUUUUAGGU  
>N430  
CUGUCGCCUCCACGCACCCCCCAGAAACCAGGAAUCAAGU  
>N432  
GCAGGAGAGUCGCUUGAACUCGGGAGGUGGAGGUGGCAGUA  
>N433  
UAAUGUUCGUAUUGUCACCUCUGUUAUUCUUUCCUCUGAC  
>N434  
CAACAUACUUGUGUGUAUAGCUUCCUUCUUUUGGGUUAUUU  
>N435  
GAUGCAGAAUAUAAAUAUUAUCAUGUACUUCUCUCAAGAUU  
>N437  
UUUCCUUCUUUUUUCACUUCUUCUUCUUCUUCUUUUCUUCUA  
>N438  
GUGAGAUGGAAACGUUAGGCCAGUCCUUUUCUGGGUAUAUC  
>N442  
CCAAAGUGCCGGGAUUACAACAUGAGCCACCAUGGCUGGCCU  
>N444  
AAAUCUGUAAAUGUAUACUCUGUCUCCACGCCUGCUGUU  
>N446  
UGUGGAAACUUUGAAGAUGGCAGGAGAGGUGAAAGGCAGUU  
>N448  
CUGCCAUGAUUUUCCCAACGCUUUUCUCCAGAGCCCUUAGU  
>N449  
CGGUGCUCUCCUGACUCUGCUCUCCUGGACAGUCAGUGGGGCCU  
>N450  
UUUACAUGUAGUGUGAAACACAAAUGAGGGGUUUAGGAAG  
>N451  
CAGCUAAUUCGAUUUUUUUCCAUAAGAGGUGGGGGGUUCUC  
>N453  
GGAAUUAAGAAAGGCCUUUUCAGGCUGGGCAUGGUGGCUCA  
>N455  
AGAACCAAUCCUUUAUCUCCACCCACACUUAAGGAUACAU  
>N457  
AGUAGCUAGGAUUACAGGCACCUUGUCACCAUGCCCAGCUAA  
>N458  
UCUUUUUGGUUAAUUUAUUCUCCAGAAGUGAGAUUACUGGGU  
>N459  
CCUGGAGGCAGGUGUCCAUGCCUAAACGUCAGCGCCUGGGGC  
>N461  
GGAGCAGGGGCUCAGGAAGGCCUCACCUGUGUCCCUAGACA

>N462  
UUCUGGGUAUAUCUGAAAAUCAGAGUAGUGAGCCUUUCAAG  
>N463  
UGUCUCAAAAAAAAAAAGGCCUUUUCAAAAGUAAAAGGGGG  
>N466  
AGUGUCCACUGAAGGCUGACACCUCUUCAUUUAAAGGGAA  
>N469  
AGCAAGUACUAUGCUUAAUACUUAACUUGUUUAUUAUUUGUUA  
>N473  
CAACAUUUUUGGCAUUGUGUCUUUGUUCUGUGGGAUUCAUU  
>N479  
ACCUCUGUUAUCUUUCCUCUGACUUUGGUUUAUAAGCCA  
>N480  
UCAAUACUCUACUGUGUCUCCUGUAGUUCCUGUGGUUGCU  
>N482  
AAAGUAGUGGGCUGUGAAUUCAGGGCUACUUGGAGCCCUUA  
>N483  
GCUGGGCAUGGUGGCUCACGCCUGUAAUCCCAGCACUUUGG  
>N484  
UCCUCUCCUCUCCUUUCCCUCUCUCUAUCUCUCUCUCUGUC  
>N485  
CCUCAGAGGAAGGAGUGCUUCUAGCAGUGAGCAUUGUGGA  
>N486  
AACAACCUGAUCCAUGAUAGCCCUUGAUUUUCUUGGCCAAAU  
>N488  
GCAGUAAGCUGAGAUCAUGCCACUGUAAUCUAGCCUGGGUG  
>N489  
AGAAAAACAUAAAAUUAGCCAGGCGUGUGGUGUGCACCUG  
>N491  
ACCACUGUCCAGGCAGUUCUCGAGGGAAUGAGUGGGGCAUA  
>N493  
CGCUUUGCCCAAGUAUUGUACCAAGUUUACUGCUCCCAGC  
>N495  
UGCACCUGUAAUCCCAGCUACUCAGGAGGCUUAGGCAGGAG  
>N498  
UGUCCCUAGACACCUUCCAGCAGAACCUCAGAGGAAGGAGU  
>N499  
GCCUCCCAGGGAUUCUCAUCUGGGUUUUCAAUACUCUACU  
>N500  
GCCAUCUCGGCUUACUGCAACCUCUGCCUCCCAGGUUCAAG  
>N501  
CAGGUGCAUUCACCAUGCCCAGCUAAUUCGAUUUUUUUUC  
>N504  
AGCUCAAGCAAUCCUCCUACCUCAGCCUCCCAAAGUGCCGG

>N506  
UUCUUUGAUUCCAGUGAGGCUAUCUUUCUGUAUUUGAUUA  
>N508  
UUUGGUUUGGUUUAGAUUAGCCAGCGGUUCUGUGGCCUUUUG  
>N509  
UUUUCUCCAGAGCCCUUAGUCAAGUAGGCCUCAAGGCCAAC  
>N512  
CUGUUAACGUGUUUCUUGACCACAGCGAAACAGUGGGUAGA  
>N513  
CUAUCUCUCUCUCUGUCUCUCUCUUUGAGACAGGGUCUUUC  
>N514  
GUGAAAGAGAAAAGGGAUGACUCAUGGCAUUAUGGUGAUUA  
>N515  
UGUGUAACCUGGGCCAGCUGCUCAGUGUCUCUGUGCUUCAG  
>N517  
CCUUGACUGCGUGCUGGCUGCCCCUCCUUUCAUGCCCGGUG  
>N518  
GAUGGAGUAAGGCUCUGUCUCAAAAAAAAAAAGGCCUUUUC  
>N521  
CUUAGAGUAGACCCUAUCACCUCUGCUGUCACCAGUGAGU  
>N523  
GGGCACUGCUUCAGCUCAGGCAGCAGGGAGACAACGUUCCC  
>N524  
UUAUCCUCCAGAAAUGUUUCUGAUUAAGAAGAUUAGUUUC  
>N525  
GGCACAGUCCUGGCCUGACUCCAGGGAAGACGCACUCUGGA  
>N526  
GCUCACGCCUGUAAUCCCAGCACUUUGGGAGGCCAAGGUGG  
>N527  
UAGCAGCUGCUCACAGCUGGCCUUGGGGAUGUUGGGCCACCA  
>N528  
UGAAUGAGGUGCUGAAUAGACUGCACCUGGCCUAUCCCAACC  
>N529  
GUAGAGCUGUACUUCAGAAACCUGAGCCAGUAGGGAGGGCU  
>N530  
AGGGUUGUGACUCUUCUGGGCGCCCCAGGCACCGUUGCCCU  
>N531  
AGCCAGGGUGACCUUGACCUCUGACCUCAUGAUCCACCCG  
>N532  
UGCUAUUCUUGUUUUUCCCGCAAUGGGGGACUUAUCUGAGG  
>N533  
UCAAAAAAAAAAGAUGGCACUCCUGAUGCCAUGGUCGCACUC  
>N534  
UCCACCUCACCAAGCCCUGCUGGGAAGGGGUAGCAGCUGC

>N535  
AAUGGGCACACAUCGUUACGCUGUGUCUUCAUGUUUUACUG  
>N537  
GCCACAGUGCUGGGUUUCAGCUACAGGUACUCAGGGUAGCU  
>N538  
CAUCCAGCUUCACACACUCGCAGGUGGAUUAUUGUGGGUGGG  
>N539  
GGUUGUGAGGGGAUGCUUUGCUCUUCUCACCCCAAACAACU  
>N540  
GUUGGAGGGCACCGUCUGUGCAGAGGGUCACUGUGGUGGGA  
>N541  
GGUGUCAGGUCUGACAUGGUCUGCAAGCAGCUGCCACAGUG  
>N542  
GAGAACCUCUCCUGGGUCCCGUUGCAUCCAGCUGUAGGG  
>N543  
GUAUCCAGACUCUCUGAUGCUAGGUGAGGUGGCAGCAAGG  
>N544  
GAGUAUAGCCGCCCAUGGGCCCAACAGACAGGGCCCAGUG  
>N546  
CAUGUGGUGUUGACAACGUUCCUGUCCACAGACGCCUUC  
>N547  
GGUGGCAGGGCUGCUGCCAUCCUCUUGCUCUACCCCCUCACC  
>N548  
UUUUCAGAAAGCCUCCCAUCCAGCUUCACACACUCGCAGGU  
>N549  
GGAUAUGUGACCAUUCUGGGCAUUUCCAGGAAGCAGGGCA  
>N550  
CUGCAA AUGUGUCUGCACUUCACCAUGUGGUGUUGACAACG  
>N551  
GGCUUGCGAUAGGCUUUUGGCUCAUCGAGUGGAAACCAAAA  
>N552  
CAGCAGGUGCUGUCUGCGUGCCUUUCCAGAAGCCUCCCAU  
>N553  
UGCCUGGGAUACAAGGUACCUCUUCAGCAUAGACGCUGGG  
>N556  
UGCCUGUACUCCUGUGAUGCCCUCUGGAGCUCCCCUCAG  
>N557  
GCUGGGACUACAGGCGGCCGCCACCACGCCUGGCUAAUUUU  
>N558  
GUCAUUUGGGCCCUAGAGGACAGGGAGGAGGACAGCAGUGA  
>N561  
UCAUGCCACUGCACUACAGCCUGGGCAGCAAGAGCGAGAU  
>N562  
CUGGGACAGCCGUGGGCUCACAGUACUGUCAGCAGGUGCUG

>N565  
CGUCUUGCGUUUUUCUGCUGCCCCAGGGUGCCUGUUACUCCU  
>N567  
UCAGAGAAUGUGGGCCCCUACGUGUUAGUUACCUUGAGGGA  
>N568  
CCUCUUGCUUACCCCCUCACCGUAGGGAGAACCUCUCCUG  
>N569  
GGAGGUUUGAGCCUGGGAAGCAGGGUAGAGCUGUACUUCAG  
>N571  
UUUUUAAGACUUUGAAACAACCACAGAUGUUCACAUUUGCA  
>N572  
AGGGGAGCUGUGGCCACUUCCCCUGAGCAAGACAUACUCCA  
>N575  
GCUCCUCCUGGAACCUGUAGCUGGAGGCUGCUGGAGGAUGC  
>N577  
UUGUUCGUUAUUCUGAUUGCCUUGUUGUGGGGGACAGAUG  
>N578  
UGUGCCUAUCAUGGCCUGGCCUUGGGGUGCAGGUUUACUCU  
>N580  
AGCAAGGACCCCAGAAUGGACUAGUCCAGCUGUCAUUUGGG  
>N582  
AGAACAGCUUUUGCAGGAGGCAGUCCGCUGCUGGAUUUCAC  
>N584  
GGAUCUCUGAUCCUGAAGCACCCCUAGCAGCUUAAGCCCAC  
>N586  
GUAGUUUGGAGGCAGUUUAGCCUCAGGGAUGAAGGGGAGCU  
>N587  
GAGUUCUUGACCAGCCUGGGCAACAUAGUGGGACCCUGUCU  
>N588  
GCAGUGGCGUGAUCUCUGCUCAAUGCAAGCUCACCUCUCCA  
>N590  
UUUGGGCUGUAUUUCAUCGUCUUGCGUUUUUCUGCUCUCCCA  
>N592  
UCGCACUCAGGAAUUUGUUGCUCGGUUAGAGUCCUGAGGGG  
>N593  
GGACCCUGGGAUGGUGGGGGCCCAGCAGUAUCCCAGACUCUC  
>N594  
UCGUUUUUUCUUUGCAUUCCCAGAAAUAUUUACAGAUUUG  
>N595  
CCUCUGUCUUUCCUUGUGUCCUCGGCGUGGUCGGGCACUGA  
>N596  
GAUUCUUGUCAGAUACAUGCAAUUUUUUUCUCUUUUUGU  
>N597  
UGGAUAUUGUGGGUGGGCCUCAGUUUCACCUUCUUGCUUAC



>N601  
CUCAGAAUAUAGGGUUAGUCCAGCUCCAGGGAGCAGGUGCU  
>N602  
CAGCUCCUUCUGUGUGGGAGCACAGCUGUGAGGAUGCCAGG  
>N604  
AUGGGCCCAACAGACAGGGCCCAGUGUCAGCUCCUUCUGUG  
>N605  
UAGCCUUAGGGUCUUGUGUGCCUAUCAUGGCCUGGCCUUGG  
>N606  
GUGUCCUCGGCGUGGUCGGGCACUGACUGUCAGUCUUGUGU  
>N607  
CUGAGGGGCAACAUUGCCUCCGGUUCGUGAAGGGCAGUUGG  
>N608  
UUGGCUCAUCGAGUGGAAACCAAAAUGAAGGGAAAUAAGU  
>N609  
UGGUGAGGGCUGUGGGUGUCCAGAGUGGUGGCAGGGCUGCU  
>N611  
CAACGUUCCUGUCCCACAGACGCCUUCCUGGUGUGUGCUGC  
>N612  
AAAUUUUUUCUCUUUUUGUCACUUGCCUUUUUAACUCAA  
>N613  
UUUGAUGUCAUUUGUGUUUUCUUGAUCAUAGAAGAAUAUGA  
>N618  
GGAGGGACGAUAAGGUAAGACGGCCCCUGGGACAGCCGUGG  
>N619  
AUUGCUIAAGCCCAGGAGUUCUUGACCAGCCUGGGCAACAU  
>N627  
GCAGAACGCCACAUGGCACCCGUUCCCACUGCAUGACGUG  
>N628  
UGCCUCAGCCUCCCGAGUAGCUGGGACUACAGGCGGCCGCC  
>N629  
AGCAAGACAUACUCCAGCCGCAGUCCAGUCCCAAGAUGAU  
>N632  
UUUGCUCUUCUCACCCCAAACAACUUUACCCUAAAGCAGCU  
>N633  
ACACAGAUGGAAAUCUGUUUCAUUCUUUAAAUUUCAUUUU  
>N634  
ACGCUGGAGGCUGUGUCCUUCCCUCUGUCUUCCUUGUGUC  
>N635  
ACAGGGUUUCACCAUGUUAGCCAGGGUGACCUUGACCUCU  
>N638  
GGCACUCCUGAUGCCAUGGUCGCACUCAGGAAUUUGUUGCU  
>N640  
AGGGGCUACUAGUCGGCCAUCUUUUUGAUGUCAUUUGUGUU

>N641  
GGGAGAAAAUAGUUUUCUUUCUAGACAUUGUUAACACUUGG  
>N642  
GUUGGGUGCUAGAGCAAGGGCUAGUAGAGGGGCUCCACCUC  
>N643  
CCUUCUAAGACCCACUUUGCCCCCGUGGACAGUGGGUUGU  
>N645  
CGCAGUAGCGAGGCGGGUGGCGUGCGAGAGUGGGGCGUGAA  
>N648  
UGGGUCCCGUUGCAUCCCAGCUGUAGGGUGGGUUGCUGGCG  
>N649  
GUGCCUCGGCUCAGCCCCUGCCCUGUUUCCCUGGGGUGUGG  
>N658  
GGAACUGGAAAUGAAUAAUACAUCUCUCGUUUUUUCUUUGC  
>N661  
UUUUUUCUCAAUAAAAGGACAUUUCUGGCCAGGCGCAGUG  
>N666  
AGAUUAGUUUCUAAAAAGUUCUUUAAACACAGAUGGAAAUC  
>N667  
AGGGAGAAAAGUCUGAAAAGCAGAACAGCUUUUGCAGGAGG  
>N668  
UUGGGGUGCAGGUUUACUCUCUGUGGUGGAUCUCUGAUCCU  
>N669  
GCAGAACUGUACAGUUUGUCCAUAAGGGAACUGGAAAUGAA  
>N672  
CCCACAGGGCAAGGCUGUGGCUGUGGCUCCACCCGUGGGGU  
>N678  
UUCACAUGCUGUCCUAAUACUUUGUAUUUCAUGUUGUUUU  
>N683  
AGGGAGGAGGACAGCAGUGACUCCAUUUCCUGGAAAGAGUG  
>N686  
AAUAGAGACCAGCACCCUGACUGAGGAAGGUGUUAUUAAG  
>N687  
ACUGGAGAUGCACCUUCCCUCAGGGCCGCUUCCACCUGGGC  
>N691  
GUCAGGUAAUAGUCUUUUUACUGUCUCUUGUUUGAUUCAAG  
>N692  
CCCAUGGUUAUGUGGCUGGUCAGCCUGGGCCUGAGGGUUGU  
>N694  
UUUUUACGUUAUUAGGCUUGCGAUAGGCUUUUGGCUCAUCG  
>N697  
UUACCUUGAGGGAAAAGGCUCAGUGGCUCUGAUCUGUGGCU  
>N698  
CCCUAGCAGCUUAAGCCCACAGGGCAAGGCUGUGGCUGUG

>N699  
AUUAAAGUUAAAACAGAGGUCAGUGCUGCCUUAAGUCAGGU  
>N701  
GCUGGCUUGGGGAUGUUGGGCCACCAGGUUUGGGUAGUUUG  
>N703  
ACAUGGUCUGCAAGCAGCUGCCACAGUGCUGGGUUUCAGCU  
>N704  
CUGGAGGCUGCUGGAGGAUGCGUUUGUGACUGUGCCUUCUU  
>N712  
AGCUCCCCUCAGUUAUUAACAUGUAGUUGUUCGUUAUUCU  
>N715  
GACUCCAGGGAAGACGCACUCUGGAGGUUUGAGCCUGGGAA  
>N716  
GACAACGUUCCUGAGAGGCCACGGUGCUAUUUACCAGGAG  
>N719  
GCUGUGAGGAUGCCAGGGGGCUCCGGUGGUGAGGGCUGUGG  
>N721  
AAGCAGCUGUUGUCUCUGGCCUUUUAUAUUUCGGUAGCAA  
>N722  
ACAGUGGAGGCCUCCUGGAUCUCUAGGUCUCAGGGCCUCUC  
>N723  
CCCCUGUCUUUGGCCCCACCAGGGGAGCCUCAGGAAAAC  
>N724  
UGUCCCGCAGGCAUCUGCAGCAUGUGGGGCGGCUCCACUA  
>N725  
GGUGCCCGAGCCAGGACUCCUUGGAAAACAUCCCGUGCUG  
>N726  
GGGCAUGGGAGGGGUGGUCCAUUGGGGAGGGUCGGCCCAG  
>N727  
GCACCGCCCCAGGUGAGCCCACAGCUGCUGGGCAGACCC  
>N728  
AGGGGCUCCCCAGCAGGGCUCUCCACGUCCAUUGG  
>N729  
CAGGCAGGCUCUUGUGGCCACCCGGGGCUUUGGGCCAUGAG  
>N730  
CCCCAAAAGUUCUCCAGGGCCUCCAUCCCGGGGGGAAGCA  
>N731  
UCCCGGGGGGAAGCAGGCUCCAGGCCUGAGAGCACCUCCCA  
>N734  
CCCCCAACCCCUUGGCUUGUCUGACACCUCUCUGUGCCCAC  
>N735  
UGCCCGCCAGAUUCCUACCCGCCCAGAUUCCUGCCUGCCA  
>N736  
CUCCGGCAGGUGGGCCCCGCCUGCCUCCACCUCUCCGUGCU

>N737  
CCCGGGCCCCCAGACCCCUCGGCCUCUCUGAGUGUCCUGU  
>N738  
GGGGGUGGCUGGACAGAUGCCCAGGGUUGACCUGUGUCUGU  
>N739  
CCUCCAGGUGCUUCAUUCUCCUCCUAACGAUGAGGCUGGUG  
>N740  
CGCCAGGGUCAGCCCCCGCCGUGCAACCGUCCCGGCUUCG  
>N741  
GGCUCCUGCCCCGGAGCGUCCAAGUGAGUGGGCUCCUGGCC  
>N742  
CGCCACCCAUCAUUCUGCCCAGACAUCUGCACUAGGCAG  
>N743  
AGCGACCACUGCAGGGGCCGCCUUGAGGUGCCCUGCCAGAG  
>N744  
GGUGGAGUCCAUUUGCUGACCCCACAGCCUGCAUCCUGCCC  
>N746  
CACUGGCCACACUGGGUCUCCUCUGGCCACAAUCCGUCCGC  
>N747  
GGGCACCUUACGUCGACAGCCAUGAGCUCCACAACUGCUGC  
>N748  
UUCUCCUCCUAACGAUGAGGCUGGUGACCUCUGGCCUGCCC  
>N749  
GCAACAGCCUGGGGGCAGCACACACUGGCCUGGGGUCCCCG  
>N750  
AUCCGUCCCCAGUGGCCACACUUGGUCCCCACUGGCCACAC  
>N751  
AGACGGUGUGCGGUAAGACGCUGCAGAGCAGAGGUGCCCGG  
>N752  
CAGGCUCCGUGUCCACAGGGCUGAAAUGCUGACACAGCCC  
>N753  
AGGCGGGCAGGGGAUAGACUCCCUGCUGAGGGUCUGGGGAG  
>N754  
UCAUUGGAUUGAGGGCCACCCAGCUAGUCCACGAUGAUGU  
>N755  
UUGGCCAGUCCCAACCGCACCUGGGCAGGCCGACUGCAGG  
>N756  
UGCGGCCCAUACAGCCUGCCACCUGCAACUCUAGGUAAGU  
>N757  
GGUAAUCCCUACUCAGCUUCCACACUCACCCUUGCAUUUCA  
>N758  
CUGCUGCUGGGCCUGACAACCCAGUGAGCAUAGGGGAAGCC  
>N759  
GACCCCGCCGCCAGUAUCUCCAGUUGGAGGAGGCACACAGG

>N760  
ACCUUCCCACACCAGCCCUCAGCUCCAGCCCGUCGCCACC  
>N761  
GGGGCGCCCCGCCCCGCGCAUGCACGCACGCACGCAGCU  
>N762  
CCUGGAGAACUGCACGGUGGCCAGGUGCGUGGGUGACAACC  
>N763  
UCUCUGGGGACACCCAGGACCCAACGGUGCAAUGUCAGGAG  
>N764  
GAGCCGGUGCCCACCAGGGGCCUGUGGGUUGGGCACAGGAG  
>N765  
AGACCUCACCUGCCCACCCACCAAAGUGUACAAGCCAUGCG  
>N766  
CCCAGUGAGCAUAGGGGAAGCCUGGGGAGGGGAAUGAGUGG  
>N770  
AGACAGUGGCCUCCAUCCUCCCGCAGUGUGCAACACAACCA  
>N771  
GUGAGGCUGAGCCGGGAUAACUGAGUGGGGGCAACUUCUUC  
>N772  
CAUUUGGACAGUUUUUCUCGCCCCGGUGAGUGCAUGUGGAUA  
>N774  
UGGAGCUGGAAGUCUGAGAUCAGGCGGGCAGGGGAUAGAC  
>N775  
AGCCCCCGAGGCACCUGCCCCCAAGUGAGACCCGAGGCACC  
>N776  
CCCCUGGACACAAUCCAUCCCCACUGGCCACACUGGGUCUC  
>N777  
CCGUGUCGUCCUGCUGGACCCAAAGCCUGUGGCCAACGUCA  
>N778  
GUGGGUGGAACCAGAGCCUUCUGUGAAGCCCCCAUGGCUU  
>N781  
CCACAGCUGCUGGGCAGACCCAGCCCUGAGUCACUUAUCCU  
>N782  
GUGGACAUCCUGCCCUGGGCGUGAGCGUCACCUUCA AUGG  
>N783  
UCAAGAUGCUUCCCUUAAUCCCAUCUGCAAAGACACUUUCU  
>N784  
GGAGCUUUUGUCUCCUGGGUCCU AACAGCGGCUUCCAUCAC  
>N787  
GGGCUGCUGUCCAAACCGCCACAAGCUGGGGAGCUUAUAC  
>N788  
CUGCCCAUCCUGGGGACUCACGUGGAUGACAGUGGAGGCCU  
>N789  
UGGUCCCCACUGGCCACACUCAGCCUCUGCCCUCUCCACUC

>N791  
CAGCCUCUGCCCUCUCCACUCCCUUCCCUGGAACCGCUGCU  
>N792  
GCCAACGUCACCUGCGUGAACAAGCACCUGCCCAUCAAAAGU  
>N793  
CACAGGGUGGGAGGAGCCGCCAGGACCAUGAUGUGCUCUC  
>N794  
CCCUCGGCCUCUCUGAGUGUCCUGUGCGGUGAGUGGGGGCG  
>N795  
UCAGCCUCUACCUGGACAACCACUACUGCACGGCCUCUGCC  
>N797  
GAGGUCCUUCUGCCUCUCCAGCUUUGGGGACUCCAGGUG  
>N798  
GGGGCCGGGCUCCUGGGUGGCCUCUUGCUGGGGGUGGGGGA  
>N800  
GUUUCAGCAAGAACGGCGUGCUUGUGUCUGUGCUGGGGACC  
>N801  
UGACAGCUGGGCUCACGGUGCCCUGGCCUGAGCUCCAGCCA  
>N804  
GUAAGCUCCGCCACCUGUGGGCGGGAUACGACCCUGGGCCCG  
>N805  
AGGGCAGGAGUCCAUCUGCACCCAGGAGGAGGGCGACUGCU  
>N807  
CUAUGCCAACCUGGGUCUGCCUGUCCUGGGAGCCAGUGGCU  
>N808  
CCUCCAGCUCAGGGUUCCCCUGGAUCCCCCAGAUCUGU  
>N809  
CGCCAUACUUAGCCCCGCCACCCCCACCCCAGCCCCACC  
>N811  
ACACUGCUGUACCCUUUCCCCACAUGCUAUGCCAACCUGGG  
>N812  
GAGUGCCACAACCUUGUGCCCCCGGGCCAUUCUUCAACGC  
>N818  
UGCAUCCUGCCCAGAUGUGUCCAGCUGCAGGGUGUGUGCUG  
>N820  
CACCUGGCCCCGCCACCGAGCCCCACCCAUCCCCGCCAUA  
>N821  
AAUGCAGCCAGCUGGAGACUCCAGGCCCCCAGGGAAGAUCU  
>N822  
GUGUGACGAGGGUUCAGUGUCGGUGCAGUGCAAGCCCCUGC  
>N823  
GUGCCUCAGUGCCACCCUCCCACCCCUUGCAGGUUGGUGC  
>N826  
AUGCCCCGGGGCUCUCUGAGCCCCACUCCUUGUCUUGACAU

>N829  
CUUGUGUCUGUGCUGGGGACCACCACCAUGCGUGUGGACAU  
>N830  
GGGGAAAAGCACGCCUGCGACUUACUCUGGGAACAAGUGGU  
>N832  
CAGGCCAGGGCCCGGCUGAGCCGAGCCACAUGGCACAGAGC  
>N833  
CGUGGGACCCGAUGGGUUUCCUAAAUUUGUGAGUGGCUCCA  
>N834  
GAGCUCCACAACUGCUGCCUCUGAGAGGUCCCUUCAGGGGC  
>N837  
GGCGGGAUACGACCCUGGGCCCGACCCAAGCACACACAGGG  
>N840  
GCUUAUACAACAGAAACCCACUCUCCGUCCUGGAGCUGGAA  
>N843  
GUGGCCUCCCCUCUCUGUGUCUGUGUCUCUUCUGUCUCCCG  
>N844  
AGCAUGUGGGGCGGCUCCACUAUUCACCUUUGACGGCAC  
>N845  
CGCCCCAGCCCCGCCACCCUGAGCCCCGCACUCCACCCA  
>N846  
AGUGCAUGUGGAUAACACUGCUGUACCCUUUCCCCACAUGC  
>N848  
CCGUGCUGCGUGCACACGGUCUGGGUUGGCUGGAGGCACAG  
>N849  
UCCCGGCUUCGUAACCGUGACCAGGCCCCGGGCGGAGAACC  
>N851  
GAGGGGAUGGCGGAGGGCUGCUUCUGCCCUGAGGACCAGAU  
>N852  
GGUGUGUGCUGGAGGCCUGCCCCUGCCUGGGAGUCCUUGU  
>N854  
GGUGGAGCAGAGUGCACCGUCGGCUAGGCUGGCAGAAUGGG  
>N855  
UUCUGGGGCCAGGAGAAGCUCAGGAUGGAAGCGGGAGCCCA  
>N857  
CACGGCCUCUGCCACUGCCGCUGCCGCCCGCUGCCCCCGCG  
>N860  
AUGAGAGAGAUCCAUGCACGCUUUGGGAUUCUCAGCCUCUA  
>N862  
CUCCCCGAGCCCACCGGCACUGCCUCCCAGCUCAGGGUUC  
>N863  
UGCCCCCGCGCCUCAGCAUCCACUACAAGUCCAUGGAUUAU  
>N865  
ACCCGCCCCAGGUGAGCCCCCGAGGCACCUGCCCCCAGGU

>N868  
UCCUGCCCUGAGGGCCGAUCCGCACAGGGGCCUGGACACG  
>N869  
CCCAUUCUACACACUGGACCCAUUUUUAUAGACGAGGCAGC  
>N870  
UGGCCAGGGACGUGGGAAGCAGCGGGGAGGUGGCCAAGCA  
>N871  
AUCCUGUGAUGGUCCCUGCCCUGAGCCCUGCCUCCCACCAC  
>N872  
AGCCACAUGGCACAGAGCUCCCCGUGCGAACCCAGGUCCA  
>N873  
GAAGUCAUCUACAAUAAGACCGACCGAGCCGGCUGCCAUUU  
>N878  
CUAGGUAAGUACAGGGAUGGCUGGUGCCUCCCUGCCACCC  
>N886  
CUCAGCACCCUCCGUGAUGCCAUGCUGUUUUCUUUCCAGCC  
>N889  
CUGCCGUGCCGCCCGCUGCCCCCGCGCCUCAGCAUCCAC  
>N890  
CUCUGGGUCAGGAGGGCCUACGCCAGCUCCAGGAAGGAGGG  
>N891  
CGCUGACCUCUGCCUUUGCUCUCCCAGAACUCUGGCUUACC  
>N892  
GCCGCCUAAGGCCGAGCGCACCCUGUGGCCUAAAUGCAGCC  
>N895  
UGGGUUGGCUGGAGGCACAGCCACAGUCCAGCUCCCGAGGC  
>N896  
CCAUGCUGUUUUCUUUCCAGCCUGCGUGGGACCCGAUGGGU  
>N897  
GGACUCCAGGUGUCCUUUGGCUGUGGCUGCAUCCCUCCGAU  
>N900  
UCCCCAGGAGGCCGCACCCACCAGGGAGGCCCCGCCACAG  
>N902  
AGGCCCGGCUGCCCUACAGCCUCUCCACAACAACACCGAG  
>N904  
CCGCGUCCAGACUCCACCCUCGGUCCUGGAGGGCCAUGGGA  
>N905  
GAGGGAAGGAGCAUCCCCAUCCCACAGGGCAGCUGUGGGGC  
>N909  
CGCAGCGAUGGCCAGUGCCCAAGACAGCUCCAGGGGGCA  
>N910  
UUGGGAGAUCGCUGGCAUCCCUUCAGGAAACCAUCAUGCAC  
>N912  
AUGGACGAGGCUUCCAUGCACUGACAGCUGGGCUCACGGUG



>N913  
GUGAAAGGCUCCCCAGAUUCCAGCCCCGCGGUGACGCCCC  
>N915  
GAGGUCAACAUCACCUUCUGCGAGGGCUCCUGCCCCGGAGC  
>N916  
ACCUCUUACACCUUCCGGGGCAACUGCACCUAUGUCCUCAU  
>N917  
UGCGGUGAGUGGGGGCGGCCCCCGGGCCCCCAGACCCUCG  
>N919  
CCUUCCCUGCUCCCCACUGCCCAUCCUGGGGACUCACGUGG  
>N920  
AGAAAGGAUGGCUGCUGGGCCCCGACUGGCACACCCCCAC  
>N923  
UUUCCUCUGUCUUUUUGGAUCUCAUAGUGCAGUGUAGUGUG  
>N927  
CUUAAAUAUAAUUUGGGGGUCCUCUUUAUUGUGCAAAAGAA  
>N928  
UUUGGAAAGUUAGUCUUUAACGUAGAUCUUUCCUUUGAUU  
>N929  
AUGUGAGCCAUUGCGCCCGGCCUGUUUUUUUUUUUUUUUU  
>N931  
GAGCUGUGAGUGCACUACUGCACUCCACCUGGGUGACAGA  
>N933  
CAUUUUUAACAUUUAAAACCGUACCACCUCUGGAACUUG  
>N934  
UACUUAGGAAUCGAGAAUUUCUAGUUCAGAACUGCAAAAAG  
>N935  
AAUGGCGUGAACCCGGGAGGCGGAGUUUGCAGUCAGCCGAA  
>N936  
CUCCGCCUCCAGGUUCAAGCAGUUCUCUGCCUCAGCCUCC  
>N938  
UUCACAAAGUAAUGCUUCAUCAUCACUAGAAGUGGUCACUG  
>N940  
GUGCACAUCCAUGAGAUUUUCAAGAAAUAUUUGGAUUAUAG  
>N943  
AUUCCUGACCUGGUGAUCUACCUGCUUCGGCCUCCCAAAGU  
>N944  
CUUAAGUAUUUGGUGGACAGCCAUGUUGAAGGAGAUUUUUC  
>N947  
ACAGGCGUGAGCCACCGUACCCAGCCUAGUUUUGCAUGUCU  
>N948  
UGGUCUCCAUCUCCUGACCUCGUGAUCCGCCACCUAGGCC  
>N949  
ACGAGGUCAGGAGAUUCGAGACCAUCCUGGCUAACACGGUGA

>N950  
AGAGAUUUGC UAAUUUACAGCAAUUUGCAGAUAGCAUCUU  
>N955  
UGUUGAUUUGUUGUUGAUAGCAUGUAUUUCUUGACCCUAG  
>N965  
CAAUACUUACUGAACCCUUUCCCCUUUAUUUUGCCAGUCU  
>N970  
CUGUGUAGCUUUGAAGUCAUCCUGAGAUAACUGCUCUGAUC  
>N971  
ACUCAAGAAGAGAAGACUUGCAACAUUUUAAUUAUACUCUU  
>N973  
AGCUACUCGGGAGGCUGAGGCAGGAGAAUGGCGUGAACCCG  
>N974  
CUUUUCACAUGACUCCUCUUCUGGGCAUAGGAACUAAAAG  
>N976  
GUGGGCUGUCUUAAGGAAGCCCUUAUAUUGUAGUUGGCUAA  
>N977  
AAUAAGUAAUUUCUUCUUUCACAUGACUCCUCUUCUGGG  
>N980  
AUGUUUAUUUAAAGCACUGUCAUUGAAAUAUUUCAUGAACA  
>N981  
AAAAUAGUGAGACCCCAUCUCUUA AAAAACAAA AUAGGGC  
>N983  
GCUCACUGUAACCUCCACCUC CCGGUUCAACCGGUUCUCU  
>N984  
UUUGAAAUGUUCUUUUCUUC C CUUAUGGACAAGAUUAGAA  
>N986  
CUUUUUCUCCCUCCCAUCUCCU UCCUUCUUUAUGACAA  
>N988  
ACAGCAUUUAACCAGAUUAUCAUCAUACUUUUAAA UUAUG  
>N990  
CUUUGGGAGGCCGAGGCUGGCGGAUCACGAGGUCAGGAGAU  
>N994  
UAAAAUAUUAUGACCUGUGACAUCAACAUGGAUUAACAAGU  
>N995  
AAAUUAGCUGAGUGUGGUGGCGGGCACCUGUAGUCCAGCU  
>N1000  
CAAGUAUCUGGCUUCUUGGUCAAGGGUUAGGAAGUUACACU  
>N1003  
UUCGAGAAGCAAAAUUUGUACAUGUAUGGCUUACAGAAA U  
>N1004  
CAGAACUGCAAAAAGAUAAACCUUGUGUAAUUCUUGUCAU  
>N1006  
UUCUAAAAAUACUCAUUUUUCU UUUCUUUUUUUCUUUUUU

>N1007  
CUUCCACCUUGGGUGACAGAGCAAGAGUCUGUCAAAAAAAAAA  
>N1008  
UAACGUUUUAAAAUGAAAAACAGUUUUGCAAGUCUCUCUUU  
>N1013  
UAAACUUUGUCAUGAGGUUGCUAGUUGUUUCACUGUCAUUU  
>N1014  
AAUGAGUUUCUUGUAGAAGACCUUGGAUUAAACAGGGUAAUA  
>N1016  
UUACCCCAUCCUCCCAGGUCCUUUUGUCCUUUUUCUCCCUC  
>N1017  
GGUUAGGAAGUUACACUGUUCUUUAGUAAACAGUGAGCAAUG  
>N1021  
AUCUUUCAUGGAUUUGAUAGCCUGCAUAAUAAGUAAUUUCU  
>N1032  
GAUAAUUGCAGUUUCUCUCUCACUUUUUAUUUCCUCUGUC  
>N1033  
GACGGAGUCUCGCUCUGUUGCCCAGGCUGGAGUGCAGUGGU  
>N1040  
GAGAUAAAUUGAAUUCACCCUUUAAAGUAUAGUUUUUUCU  
>N1047  
GUCCCAGCACUUUGGGAGGCCAAGGUGGGCAGGUUACUUGA  
>N1048  
UGAAAAAUAUUUAAGCAGAGCUAAUAAAAAUGUUGCACAAA  
>N1051  
CAGUUUAUAUAUAUGUUCUCAUCCAGCUCGAUUUGUGUUU  
>N1052  
AGAAUAAGGGCAGAGUUUGCCAGAUAAUUGCAGUUUCUCU  
>N1053  
UCUUUGUCAUUUUUUUUUCUCAUUAUUUGGAGACUUUUGAC  
>N1057  
AGGCCAAGGUGGGCAGGUUACUUGAGCCCAGGAGUUCAAGA  
>N1058  
UGAAAAACAGUUUUGCAAGUCUCUCUUUCUUUUUUUUUUUU  
>N1059  
UGGGGAGUUAACAAUCAUUUCGAGAAGCAAAAUUUGUACAU  
>N1062  
UGGUAUCCUUGUUUAUUGCCCAGAUAAAGUUUAAUCUUUUUU  
>N1064  
GUGACAUCAACAUGGAUUAAACAAGUAUCUGGCUUCUUGGUC  
>N1067  
UUGUGUGUUGUGUUUCUUCUCUUUUUGGAGUCUGAUUUUUA  
>N1069  
CCCUUCCCCCUUUAUUUUGCCAGUCUUUUCUACGUAAUAG

>N1072  
GUUUUGCCAUGUUGGCCAGGCUGGUCUGGAACUCCUGACCU  
>N1073  
UAUGAGUGCACUGUUAUGCCCAGAAGAGUAUAGGAGGUGCU  
>N1075  
UUUUUUUUAAAACCCAGUUGCAUUGUAUUUAUGUGAUAAAC  
>N1076  
GCAGUGGGCGCAAUACUCCGCCUCCCGAGUUCAUGUCAUUCU  
>N1079  
CUUGUUA AUGUUGGGGAACUCACUUUCUAGUUA AUUCAGU  
>N1081  
AAUGACUGUGACCUCAGGUACAUGCAUAUAGAUGUUUAAA  
>N1082  
AGGCGGGCAGAUCAUGAGGUCAGGAGAUCCAGAGCAUCCUG  
>N1083  
UGGGAAAAGAGAAAUAUUACAAAAAUGUGCUUUCAGUGA  
>N1085  
UGUGCCCAGCCUUUUCUUUCCUAAUCUGAUUUACUCAAUGA  
>N1086  
AUAGGCUUUCCUCCUAAUACUGGAUUGCAGUGACACUUGC  
>N1089  
AGGGUUUCACUAUGCCAGGUCUAAACUCCUGAACCCAAGU  
>N1091  
AUCUGUCAACCUCGGCCUCCCAAAGUGUUGGGAUUACAGGU  
>N1099  
UACAGGCACCUGCCACUAUGCUCACCUAAUUUUGGAAUUUU  
>N1102  
AACCGUACCACCCUCUGGAACUUGCCAUCUGUUAUGAGUGC  
>N1104  
AGUGCAGUGUAGUGUGUGAUCUCAUCUCAGUGAAAUAAAAU  
>N1105  
UUUGUUUAUGUAGGUUAUAUCUACCAAUAUUUGUCAUAUUA  
>N1113  
CUCUUACCGGUGGCUGGUAGCUUAUGUACUUUCAGAGAAUG  
>N1116  
UAAUGUUAUCAGUGGAGGUCAUAGUUUCAUUUUUAACAU  
>N1120  
UAGGUUGUAUCUUGAUUUGCCGCAUGAUAAAAGCCAUAUUAU  
>N1121  
GGGUCCCCUCUCGUUAUCACUGGAUCCUCAUCCUCUGAGG  
>N1122  
GGGAGUUGCUCUGCAGCCCACGCCGGGGGUUCUCCUGGGAC  
>N1123  
ACGGCUGGCACCUCUUUCCAGAUGGGGAAACUGAGGCAG

>N1124  
CACUCCCUCCUCGCCCCGCUCCAAGGAAGCACCCGCCGCCUC  
>N1125  
CAGACCCCCAGCUCCCACCUCUCCCAGACCCCCAGCUCAC  
>N1127  
CCCUGCCGCUUCCGGCCCCGCAACACAGGCAGUUCGCACCG  
>N1130  
GGUUCSCCCCCGAGGUUCCCGCCAGGGUCCCCGCCAAGGUUC  
>N1131  
ACUUCAUGGAACUCUCCAGACAUCCUGCUCCCUGCCCCUAA  
>N1132  
CAGAGACACGCAGGUGGACACACACACAUGCACACGCUG  
>N1133  
CAGGGAAGUGGCCUGCGGCCAUGACUCAUCUCAGCGCUCA  
>N1134  
CUCACACCUGGUGAGACACUCACCUGUGAGGCCCCCGGGCCU  
>N1135  
CUCCACCGAGCCCCAGUGCGCCAACUGCCCCAUCUGCUUGG  
>N1136  
GCUUAGGGGACACACUGUAGCUGGGACGGGGCUGUCACUCC  
>N1137  
CAGAUCCUGAGCUGGUAGUGCCAGGAAGGUCCCGGUCCCGG  
>N1139  
GGGUCUGUCCCCUCCUCCACCGAGCCCCAGUGCGCCAACUG  
>N1140  
UCGUUUUAAAAGAAUUGUGUCUUUAACGGCCUGUCCUCAAG  
>N1141  
GCUUCUGGAAGCUUGUGCCUCCAGCCCAGCCCUGCAUGGAG  
>N1144  
CUGGUGAUUAGGAGGCCCCACUCCCUCCUCGCCCCGCUCCAA  
>N1148  
CACCCUGGGAUACAUUGGGCCUAGGAUUUUGAGGCCAGCCU  
>N1150  
CCCAGGCUGCUCAUCGGGGGCAGGAGGAGCCUGCGGCUGGG  
>N1151  
CGAGGUCCCCACCGAGGUCCCCGCCGAGGUCCCCCGAGG  
>N1152  
GUCCCCAAGCUGGGGUGCCCCUCACCCCACACCAAGGAGGG  
>N1154  
GAGCCAAGAUGGCAUCAUUGCACUCCAGCCUGGUGAACAAG  
>N1155  
CAGCCUGGGUAUGCGUGACCCCAAACAGCUGGUUAAUUC  
>N1156  
AGGGGGCUCAGCCUCUGCCUCCUGACCUGGGGAAGCCAGCA

>N1160  
CAGUUCCCUCAAUAGCUGCCCCGCUCGGACCCUGGCAUUGU  
>N1162  
CCUAGGAUUUUGAGGCCAGCCUGGCAACAUAGGCAGACCCC  
>N1163  
UGGACACACACACAUGCACACGCUGACUGCCCUGGCUCC  
>N1164  
CCAGGUUUUCCCCACCACGGGCUGCUGAAGCACCUACGGCUG  
>N1166  
CCAAAACAGCUGGUUAAUUCCCUGAAAAGAAUUGAGUGCCA  
>N1167  
GCACCAUCCCUGCUGCGGAACGAGAGGCAGGCAGGUGUCCC  
>N1169  
AUCCCCCAGUAGGGUCCUGCCCACACUGGCUCCACCCUGA  
>N1170  
GGACGGGAUCCGCCUGGAGACUGCCAGCCUCCCGUGCCGC  
>N1171  
ACACCUCCUCCCUGAGACCCCCAGCUCACACCUCCUCCCUG  
>N1172  
GAGAAGGAACCGGCCACCCCGGCUGCAUCCCUGGGGCGG  
>N1173  
CCAGCGCUCCCGUGGGGCCCCACCUGCCAUCCCCCAGUAG  
>N1174  
GGGUACACCGCCCGGGGAGCUUGGUGCUGUGAAGGAGGGG  
>N1177  
CUCGGUCAGAAUCUACCCUGCCGCUUCCGGCCCCGCAACAC  
>N1178  
ACGGCAGCAGCAGAGGCUGACGCUCCACCACCCUGCCUUC  
>N1180  
GGCUGCUCUUUCAGGGGCGCCCCACGUCUGCUUGACCCCGU  
>N1181  
CAAGUUGCCACAAGCCUGGCCCCGCUGAGGUUCACGCCGAG  
>N1182  
GACCCCGUCCUCAGGGGCGCCAGGCAUUGAAGCAGCCUCGG  
>N1184  
AUGUAGGCACAGGUGGCUGUCAGGGAGGGCUUCUUGGAGGA  
>N1185  
GGAAGAGGGCAAGGUGGACCCCAGGUAGGGCUCCCCCAGCC  
>N1187  
GCCUGCCACUCUGUCAUCACUGGCAGGAAAGGGGUGCUAA  
>N1188  
GGCUGAACAAGACAUGAGCUCUGCCCGUACUGUCCCUGUGU  
>N1191  
CCCAGUAGGAGCCCCCGCCCCAGCACAGUGAACCCAGGACA

>N1192  
UGAGGUUCCUGCCGAAGCCCCAACGUGUGAUUAGGAAAGCG  
>N1194  
GGGGUGGGAGUUCUAAUAAUCACUCAUUUGCUGCUUUGCAG  
>N1195  
GAGCUUAAGAGCAGUACACACUGGAAGGCAGGGAGGGAUUG  
>N1196  
AGGGCUUCUAGCCAAAUGACCCGGGGAAAUACAGGUUACGC  
>N1199  
GGCAGACACUCACUGCAUGCCUCCAGGGUGUCAGGCACCAG  
>N1203  
UGGGGCCUCGGUCACUGCCCCUGCACCAGGGCACCAAGGCC  
>N1204  
GUCCAGACUACUUCUUGUCGCUUCUGGAAGCUUGUGCCU  
>N1207  
AUGGCGCCUUCCCAGGUCCCCACAGGCCUCUCCUCUGUGUG  
>N1210  
GUUUCUGCAGUUUCUGCCCCCGAGGGGCCUUGGUGGAGGCCU  
>N1212  
UCCUCAUCCUCUGAGGCCUUCUUUCCUGGGCUCUGUCCUGG  
>N1218  
AAGCCUCACGUCGCCGGCUGCUCUUUCAGGGGCGCCCCACG  
>N1220  
AUCAGGAGGGAGCCAGGAAUCCCGACGCCGUGGGGUGGAGG  
>N1221  
AGAGCCACUCAGCCUUCAUGCUCCACUUGUGAAUCCACUC  
>N1229  
CUUCUUGGUGUGAACUACAACCUGGUCCUCUGAAGGUCCCU  
>N1230  
GGCGCUCAUUCACGGAGCCCCCGGGGGGCUGCACUGCACC  
>N1231  
CCAUCUUCAGAGCCAGAGACCCCCAGAUGGUGAUUCUCCA  
>N1232  
UGACGGACAGAAAGUCAUCCCCAUGGUGUGGUCACUGUGGG  
>N1233  
UCUGUCCUGGUUCCCCAUCCCCUGGCAGCCUGGGAGCUCCA  
>N1234  
UGCCCUGUCCCAAGUCAUGUCCUGCUUCUGUGACCCUCCUC  
>N1236  
GUGAACCAAGGGUGGGCUUCUCCCGCCGUCUCCUCCUGGUUC  
>N1242  
GAGGGAAUGUGGCCCGGCUCCCAGCCCUGUGCCUGCACAAG  
>N1244  
GGGCUGUCACUCCCCAGGGGCCAGGAGCCCCGUGUGUGGGC

>N1246  
AUCAGAGGUAGGGACAGAUCUGAGCUGGUAGUGCCAGGAA  
>N1247  
CCAGGACAACGUCGGGGCUGCCUGAGUGCCAGCGCCCCUGU  
>N1254  
CAGCAGAGCCGGGACUCAAAACCAGGCUGCCUUCGAGUCUGG  
>N1256  
UUCAGAAAGGUUACGUAGCUCAGCCAAAGUCACACAGCUGG  
>N1258  
CUGAUCUGUCCCCACUCCUCAAGGGACUCUCCUUGUGUGU  
>N1266  
AGGUCUUCAAUUGUUUAAAGCAGCUGCAUUUGGGAGCACCC  
>N1268  
UCAGAGGCCGUGUGAGACAGCGAGGUCUUCAAUUGUUUAAA  
>N1271  
CCUCAGUCCCCGCCCCAGGCAGUCAUACGCACACACGUGC  
>N1277  
CUUGC GGGAAGCAGCUCUCACACCUGGUGAGACACUCACCU  
>N1278  
UACAGUUGUUUGUGGUUUGUCUUUGGUAAUUGCCAGUUGCG  
>N1279  
GGCCUGUCCUCAAGUACAGUCACAUGCGGAGGUGCCAAGGG  
>N1290  
GGGGAGACACACUCAGCCCACGGCAGCAGAGGCUGACG  
>N1291  
UUGUCCCUGCGUGACGAUGUCCUGGUCGCCUGUGAGCUCCC  
>N1292  
CUUGAGUGUUCGAAUGGGUACCAGGCAGAUUCAGAGGGAGG  
>N1294  
GGCUGCUGAAGCACCUACGGCUGGCACCUCUUCCAGAU  
>N1296  
CUAGCUCUAUGUGUAUGUGACGGACAGAAAGUCAUCCCCAU  
>N1297  
UGUCCCUGUGUGUGGCUGCUCCUCUGGGGGUCUGGGAGCGG  
>N1298  
CCACCCAGCCAAGCCCUUCUCGAUUCUCAGACCUCAGAGGC  
>N1300  
AACCCAGCUAGCGUCCCCUCAGUCCCCGCCCCAGGCAGU  
>N1306  
CGGGGAGGGGCCUGAGGGGGCCACUGCCUGGGGGAGCUUGGC  
>N1308  
CCCGUGCCGCUUUGGGGAUUCAGGAGAUUACGUACAGUUGU  
>N1309  
AGGCAGGGGCCGAGUGAUGUCCCCCAUGUCAGGACCAGAG



>N1310  
GCUGUGGGACCACAGAGCCCCAGUAGGAGCCCCCGCCCCAG  
>N1311  
GUUCCAUAACUCAAAUCAACCUACAAAAAUGGCUGUAAUC  
>N1312  
AUUCUCCACUGCACCCUUCAGGGCAAUGAACUGCACCCA  
>N1313  
GAUUCAGAGGGAGGCAGAGCCAUGGGCUGCUUGGGAAUGUC  
>N1315  
UGGUUUCUUGCCCAGGGUAUCCUACCUGGGGUUCUGUCAGG  
>N1321  
ACCAUUGUUUGAGCAUUAUCCUAAAGUCCCUGGGAUAUUC  
>N1322  
UAAAAGAACAGAGCCAUUUCCCUCAUGCUGUUCAGCUGAGC  
>N1323  
UGAGAGCCUCGUGAGCUGAGCCGAGAGCCGUGCAGGACUCA  
>N1324  
AGAGCCUGUCUCAUUUCCUGCUCUAGGGAAUACAAGUCCC  
>N1327  
CUGACCCCUCAUGAACAAAUCUCUGCCAGCUUCAACUUUC  
>N1328  
CUCACUACACUAAAUCAUUUCUUUUUUUUUCUCUCUCUCUC  
>N1329  
UAAAGCGAGGUAUGCCUGCACCGCAGGAGGCUAUUUACUUU  
>N1330  
AACACAUUCCAAAUGAUAUCCUCACAGCCCAGAGAGGAAG  
>N1332  
UUCGAAGCCAGGCACGGAUCCCUUUUCUAGGAUGAAAGUCC  
>N1333  
ACACUUUUCUGUGUGUUCACAAUUUGGCUAACUGGUAGGA  
>N1337  
GUCUACAUUGAAAUCUGAUCUGUUUUGUUUUUGUUUUGUU  
>N1339  
GCGCCCGCCACCACGCCCAGCUAAUUUCUCUAUUUUUAGUA  
>N1340  
CCCCAUCUCUACAGAAACUACAAAAAUAGCCGGGUGGUGA  
>N1341  
AGAUGCAACGGGCAGCCAGACAGCAGAGUCUGGACCACAGG  
>N1344  
UUAGUAGAGACAGGGUUUCACCGUGUUAGCCAAGAUGGUCU  
>N1345  
UCUUUGCACAUCUUCUGCACAACUGGCCGCAGCUUCUCCA  
>N1348  
GCCCAUUUCUUUAGCCUUGGCUUCUUAACAGCGUUAUCUU

>N1349  
ACUAAAAAUACAAAAUCAGCUGGGCUUGGUGGCAGGUGCC  
>N1350  
AAGUCCAUGGCAGUGGCCUUUCUGGGGGUGGACGACGGGGAC  
>N1351  
ACUCAGUGAGGAUGGGUGACCUGGCCCAUGAUCCUCUGCAG  
>N1352  
AGACCGGAGGGUGUGGGCAACACUUGGGGAGGGGAGGUGGC  
>N1354  
GCAGGGAGUUAAGUUACUCGCCCAAGAUUUCACGGCAGUCA  
>N1356  
GUGACUUCAGGAAAACGAAGCUGACUGUGGUGCAUGAGAUG  
>N1357  
AGCUUCUCCAUCCGUACUUGCUGCUUCACUUUGCCUUUUUC  
>N1359  
CUGGGUGUUAGUUACACAAGCAGACAU AUGGAAAU AUUCAC  
>N1360  
AGACUUGCAGAGUGCGAGGGCCUUGCUCUGGAUUGGGCUCC  
>N1361  
GGGUGACCUGGCCCAUGAUCCUCUGCAGGCUCUUGCCGGCC  
>N1365  
AGCACUUAGCACAUAGGAAGCACCCAAUCCAUCUCAGCUGC  
>N1367  
UAAAAGGCGGGUGUGUGGAGCCAUUUCUUUAGCCUUGGCU  
>N1368  
CUAAACUGAACCAUUUCUAGCUUUUGAUUUAAGUGACAGA  
>N1370  
CCGGCAGCGGAGGUUCCAGCCCACGCUCUGGCACUUCCUAA  
>N1371  
UUCCUCUGCAGCUUCCUCACCUCUCUCAGCCUUCACAGACU  
>N1374  
AGGCGGAGGUUGCAGUGAGGCAAGAUUGGGCCACUGCACUC  
>N1376  
AUAGAUGAAGGUUGCCGGGUCCGGUCUGUGGUGCCCAAAC  
>N1381  
AGCUUAGCAUUGAAUAAAGACAGAAUGGGGUUUUUAUAAGC  
>N1382  
GACUGUUUAUUUAGGU AUGCACUAGCUCAGUGGAUUUGCA  
>N1383  
CAGGUGGGAAACCAGAUGGACACAGGUCAUCCAACCCCACA  
>N1384  
CAAGUAGCUGAGACCACAGGCAUGCACAACCAUGCCUGGCU  
>N1386  
UCUUGUGUUCACUGGAGAAGCACUUUGAAUUUCCUAAAAC

>N1389  
UCCAGGACACUGAAGAUGUCCAUAUCUUGAUCUGGGUGUU  
>N1391  
GAAUGCGAGGUGGCCACACACUCCAACUGGUGAAAAAAA  
>N1393  
GCUCAUUGCAGCCUCAAACUCCUGGGCUCAGAUGAUCCCC  
>N1394  
AAGGACUGGCUAAAUCCAGACAUUUGUAAAAACAGUUAUGC  
>N1395  
CUGAGAUGACAAGUGUGAGCCACCGCGCCCGGCCAGUCUUC  
>N1398  
GGAGGCCGGCAACCCUGAACCAGGGAACUGGCCAGCGGAAG  
>N1400  
UCUUUAUCCGACCACUCAAAACUUUCUCCAUAUCAGCAGUGG  
>N1401  
GUGAAAUGACAUAUAAAUAACAUGAUGUAGGUUAAAGAACU  
>N1404  
CUGAAUAGUCAGAUUUCACGCACGCUGGGAGCCACGGAUGC  
>N1406  
UAUCUUGGCUUUCAACAAGCCUCCUCACUACACUAAAUCA  
>N1411  
CUUUUUAACCCUUGCCUUGCCUGUUACUUUUCUUGGAGUAA  
>N1413  
GAGCGGGGAGAAGAGAGAGGCUGGGAAAGGCUGGUGGGCGG  
>N1414  
AAACUGAGGACCGGAGAGACCGAUUUGGAGAAGGGAAGGAC  
>N1415  
CUGGUUCCGGGGGAACAGACCCUAAGUCCAGGUGGAGACAU  
>N1416  
GCACUGGUUUAAGUCACCCUGCACUGGCCCCUACACUA  
>N1423  
UUCUGCACAACUGGCCGCAGCUUCUCCAUCCGUACUUGCUG
